# Supplementary material
Source: Elsevier journal article supplement (https://www.sciencedirect.com/science/article/pii/S157921291500004X)
Supplement: mmc1 [file S157921291500004X:mmc1.pdf]

## Artículo especial

# Consenso español para la prevención y el tratamiento de la infección bronquial por *Pseudomonas aeruginosa* en el paciente con fibrosis quística

## Spanish consensus on the prevention and treatment of *Pseudomonas aeruginosa* bronchial infections in cystic fibrosis patients

Rafael Cantón<sup>1,2</sup>, Luis Máiz<sup>3</sup>, Amparo Escribano<sup>4</sup>, Casilda Oliveira<sup>5</sup>, Antonio Oliver<sup>2,6</sup>, Oscar Asensio<sup>7</sup>, Silvia Gartner<sup>8</sup>, Eva Roma<sup>9</sup>, Esther Quintana-Gallego<sup>10</sup>, Antonio Salcedo<sup>11</sup>, Rosa Girón<sup>12</sup>, María Isabel Barrio<sup>13</sup>, María Dolores Pastor<sup>14</sup>, Concepción Prados<sup>15</sup>, María Teresa Martínez-Martínez<sup>16</sup>, José Barberán<sup>17</sup>, Juan José Castón<sup>18</sup>, Luis Martínez-Martínez<sup>2,19</sup>, José Luis Poveda<sup>9</sup>, Carlos Vázquez<sup>20</sup>, Javier de Gracia<sup>21</sup>, Amparo Solé<sup>22</sup> en representación del Grupo Español de Consenso del Tratamiento Antimicrobiano en el Paciente con Fibrosis Quística\*

<sup>1</sup>Servicio de Microbiología. Hospital Universitario Ramón y Cajal e Instituto Ramón y Cajal de Investigaciones Sanitarias (IRYCIS), Madrid;

<sup>2</sup>Red Española de Investigación en Patología Infecciosa (REIPI), Instituto de Salud Carlos III, Madrid;

<sup>3</sup>Unidad de Bronquiectasias y Fibrosis Quística. Servicio de Neumología Hospital Universitario Ramón y Cajal e Instituto Ramón y Cajal de Investigaciones Sanitarias (IRYCIS), Madrid;

<sup>4</sup>Servicio de Pediatría. Unidad de Neumología Pediátrica y Fibrosis Quística, Hospital Clínico Universitario, Universidad de Valencia, Valencia;

<sup>5</sup>Unidad de Gestión Clínica de Enfermedades Respiratorias. Hospital Regional Universitario de Málaga, Instituto de Investigación Biomédica de Málaga (IBIMA), Universidad de Málaga, Málaga;

<sup>6</sup>Servicio de Microbiología y Unidad de Investigación, Hospital Universitario Son Espases, Instituto de Investigación Sanitaria de Palma (IdISPa), Palma de Mallorca;

<sup>7</sup>Unidad de Neumología y Alergia Pediátrica, Hospital Universitario de Sabadell. Corporació Sanitaria Parc Taulí, Barcelona

<sup>8</sup>Unidad de Neumología Pediátrica y Fibrosis Quística, Hospital Universitario Vall d'Hebron, Barcelona

<sup>9</sup>Servicio de Farmacia, Hospital Universitario y Politécnico de La Fe, Valencia;

<sup>10</sup>Unidad de Fibrosis Quística, Servicio de Neumología Hospital Universitario, Virgen del Rocío. Sevilla

<sup>11</sup>Unidad de Fibrosis Quística Interhospitalaria Niño Jesús-Gregorio Marañón, Madrid;

<sup>12</sup>Unidad de Bronquiectasias y Fibrosis Quística. Hospital Universitario La Princesa, Instituto La Princesa de Investigación Sanitaria, Madrid;

<sup>13</sup>Sección de Neumología Pediátrica y Unidad de Fibrosis Quística. Hospital Universitario La Paz. Madrid;

<sup>14</sup>Unidad de Neumología Pedátrica y Fibrosis Quística, Hospital Universitario Virgen de la Arrixaca, Murcia;

<sup>15</sup>Unidad de Fibrosis Quística y Bronquiectasias, Servicio de Neumología, Hospital Universitario La Paz, Madrid;

<sup>16</sup>Servicio de Neumología, Unidad de Fibrosis Quística, Hospital Universitario 12 de Octubre, Madrid,

<sup>17</sup>Departamento de Medicina Interna. Hospital Montepíncipe, Universidad CEU San Pablo, Madrid;

<sup>18</sup>Unidad de Enfermedades Infecciosas, Hospital General Universitario de Ciudad Real, Ciudad Real;

<sup>19</sup>Servicio de Microbiología, Hospital Universitario Marqués de Valdecilla-IDIVAL y Departamento de Biología Molecular, Universidad de Cantabria, Santander;

<sup>20</sup>Unidad de Neumología Pediátrica y Fibrosis Quística, Hospital Universitario de Cruces, Baracaldo;

<sup>21</sup>Servicio de Neumología y CIBER en Enfermedades Respiratorias (CibeRES), Hospital Universitari Vall d'Hebron, Universidad Autónoma, Barcelona;

<sup>22</sup>Unidad de Trasplante Pulmonar y Fibrosis Quística, Hospital Universitario y Politécnico la Fe, Valencia.

\*Grupo Español de Consenso del Tratamiento Antimicrobiano en el Paciente con Fibrosis Quística de las Sociedades Españolas de Fibrosis Quística (SEFQ), Enfermedades Infecciosas y Microbiología Clínica (SEIMC), Neumología Pediátrica (SENP), Neumología y Cirugía Torácica (SEPAR), Quimioterapia (SEQ) y Farmacia Hospitalaria (SEFH)

**\*Correspondencia:**

Dr. R. Cantón. Servicio de Microbiología. Hospital Ramón y Cajal. 28034-Madrid. [rafael.canton@salud.madrid.org](mailto:rafael.canton@salud.madrid.org)

Dra. A. Solé. Unidad de Trasplante Pulmonar y Fibrosis Quística. Hospital Universitario y Politécnico la Fe. 46026-Valencia. [sole\\_amp@gva.es](mailto:sole_amp@gva.es)

**Resumen**

*Pseudomonas aeruginosa* es el patógeno más importante en la infección broncopulmonar en fibrosis quística (FQ). Solo se erradica en la infección inicial mientras que la reducción de su carga bacteriana es el objetivo terapéutico en la infección crónica y exacerbaciones. El cribado neonatal y la farmacocinética/farmacodinámica han cambiado el manejo del paciente con FQ. Se debe realizar un seguimiento microbiológico en los pacientes sin infección por *P. aeruginosa*. En la

infección inicial, se recomienda tratamiento inhalado (28 días) con colistina (0.5-2 MU/8h), tobramicina (300 mg/12h) o aztreonam (75 mg/8h) con o sin ciprofloxacino oral (15-20 mg/kg/12h, 2-3 semanas). En la infección crónica, se recomienda sólo vía inhalada en tratamiento continuo con colistina, o en ciclos *on-off* de 28 días con tobramicina o aztreonam. Durante las exacerbaciones leves-moderadas se recomienda tratamiento oral (ciprofloxacino, 2-3 semanas) y en las graves tratamiento intravenoso (beta-lactámico asociado a un aminoglicósido o una fluoroquinolona). Estudios futuros sustentarán la rotación y nuevas combinaciones de antimicrobianos. Se deben establecer también medidas epidemiológicas que eviten nuevas infecciones y la transmisión cruzada de *P. aeruginosa*.

**Palabras clave:** fibrosis quística, *Pseudomonas aeruginosa*, infección bronquial, tratamiento antibiótico

## Abstract

*Pseudomonas aeruginosa* is the main pathogen in bronchopulmonary infections in cystic fibrosis (CF) patients. Eradication is only possible during the early stages of the infection. The therapeutic goal for chronic infection and exacerbations is reduction of the bacterial load. Neonatal screening and pharmacokinetic/pharmacodynamic knowledge has modified management of the CF patient. Culture-based microbiological follow-up should be performed in patients with no *P. aeruginosa* infection. At the time of initial infection, a 28-day course of inhaled colistin (0.5-2 MU/tid), tobramycin (300 mg/bid) or aztreonam (75 mg/tid), with or without oral ciprofloxacin (15-20 mg/kg/bid, 2-3 weeks), is recommended. In chronic infections, treatment is based on administration of inhaled colistin continuously or in 28-day on-off cycles with tobramycin or aztreonam. During mild-moderate exacerbations, oral ciprofloxacin (2-3 weeks) can be administered, while serious exacerbations must be treated with intravenous combination therapy (beta-lactam with an aminoglycoside or a fluoroquinolone). Future studies will support rotation strategies and new combination therapies. Epidemiological measures should also be implemented for the prevention of new infections and cross infections with *P. aeruginosa*.

**Key words:** cystic fibrosis, *Pseudomonas aeruginosa*, bronchial infection, antibiotic treatment

## Introducción y justificación del documento

La infección bronquial por *Pseudomonas aeruginosa* continúa siendo el hecho con mayor trascendencia que marca el manejo y la evolución de los pacientes con fibrosis quística (FQ). En 2005, el Grupo Español de Consenso del Tratamiento Antimicrobiano en el Paciente con FQ publicó un documento sobre el tratamiento antimicrobiano frente a la colonización pulmonar por *P. aeruginosa* en estos pacientes<sup>1</sup>. Este documento fue pionero al considerar, entre otros, los farmacocinéticos (PK) y farmacodinámicos (PD) del tratamiento y la dinámica de la infección bacteriana. Recogía recomendaciones específicas de tratamiento en las diferentes etapas de la infección por *P. aeruginosa*, explicaba los objetivos y fundamentos terapéuticos, establecía recomendaciones de diagnóstico y seguimiento microbiológico, y las medidas de prevención y control epidemiológico. Desde entonces se han publicado otras recomendaciones nacionales e internacionales<sup>2-6</sup>, se ha avanzado en el conocimiento científico de la infección por *P. aeruginosa* en la FQ y en su seguimiento microbiológico<sup>7-12</sup>, se han autorizado nuevos antimicrobianos específicos para esta situación<sup>13,14</sup>, se conocen mejor los aspectos PK/PD que deben guiar la utilización de los antimicrobianos<sup>15-17</sup>, se han universalizado los programas de cribado neonatal<sup>18</sup> y existe una mayor sensibilidad para la utilización de pautas de tratamiento coste-efectivas<sup>4</sup> y la implementación de medidas que limiten la transmisión de *P. aeruginosa*<sup>19</sup>.

La acumulación de esta información hace necesaria la actualización del consenso de 2005. En esta ocasión, se ha ampliado el número de autores que han participado en su elaboración y el de las sociedades científicas que lo suscriben. Este documento establece recomendaciones de evaluación clínica y microbiológica en los pacientes con FQ en relación a *P. aeruginosa*, los criterios microbiológicos que definen los diferentes etapas de la infección por este patógeno, los fundamentos y estrategias

para la prevención y el tratamiento antimicrobiano en las diferentes etapas de la infección, los criterios de utilización de fármacos con actividad antiinflamatoria, las medidas de control epidemiológico de la infección bronquial por *P. aeruginosa* en los diferentes ámbitos de atención a estos pacientes y en su actividad cotidiana, y los aspectos clave farmacoeconómicos que deben guiar el uso costo-efectivo del tratamiento antimicrobiano en los pacientes con FQ. Las recomendaciones se establecieron según los grados de evidencia científica recogidos en la tabla 1<sup>20</sup>. Se ha considerado en primer lugar la evidencia científica recogida en los estudios publicados en revistas incluidas en PubMed y con posterioridad se ha ponderando la experiencia clínica acumulada.

## **Evaluación clínica**

*P. aeruginosa* es el patógeno que coloniza con mayor frecuencia el tracto respiratorio en los pacientes con FQ. Su detección precoz y la puesta en marcha de estrategias de erradicación se han asociado con un claro beneficio clínico y una mejora de la supervivencia<sup>21</sup>. La infección bronquial crónica por cepas mucoides se ha relacionado con el deterioro de la función pulmonar<sup>22,23</sup>.

### **Evaluación precoz de la colonización por *Pseudomonas aeruginosa***

Actualmente, la mayoría de los pacientes con FQ se diagnostica al nacimiento, antes de que existan signos evidentes de la enfermedad. El cribado neonatal facilita un seguimiento microbiológico más exhaustivo, con una pronta detección de *P. aeruginosa* en las muestras respiratorias y la puesta en marcha de estrategias terapéuticas para su erradicación<sup>21</sup>. Este hecho ha llevado a que, aunque la colonización inicial es frecuentemente muy temprana, la prevalencia de infección bronquial crónica por *P. aeruginosa* durante la infancia sea extremadamente baja en algunos centros<sup>18,24</sup>.

La detección precoz de *P. aeruginosa* está basada en la realización de cultivos microbiológicos frecuentes de las secreciones respiratorias obtenidas por aspiración faríngea profunda, frotis faríngeo tras tos voluntaria, aspirado endofaríngeo, esputo espontáneo o inducido o, en casos seleccionados, por técnicas invasivas como el lavado broncoalveolar (LBA) mediante broncoscopia<sup>25,26</sup>. La realización de la broncoscopia puede ser útil en estudios de investigación y en casos seleccionados en la práctica clínica, tanto en la detección precoz de microorganismos como de un patrón inflamatorio<sup>26,27</sup>, sobre todo en los niños diagnosticados de FQ por cribado neonatal habitualmente asintomáticos (III-A).

También es necesario establecer parámetros microbiológicos sensibles que hagan sospechar, o permitan evidenciar, la infección precoz por *P. aeruginosa*. Puede ser útil la monitorización seriada de anticuerpos frente a *P. aeruginosa*, ya que pueden detectarse incluso de 6 a 12 meses antes de que se objete en los cultivos microbiológicos convencionales (III-B)<sup>28,29</sup>. Asimismo, se han propuesto métodos moleculares como la PCR (*polymerase chain reaction*) en tiempo real, para la detección precoz de *P. aeruginosa* en la vía aérea (III-B)<sup>30</sup>. Sin embargo, su significado clínico es incierto ya que un resultado positivo indica detección de DNA bacteriano pero no viabilidad del microorganismo o su persistencia. La presencia de compuestos orgánicos volátiles en el esputo puede indicar también infección por *P. aeruginosa*, incluso en pacientes con cultivo negativo (III-C)<sup>31</sup>.

### **Consecuencias clínicas y de laboratorio de la infección por *Pseudomonas aeruginosa***

La infección por *P. aeruginosa* aumenta con la edad, evidenciándose hasta en el 30% de los pacientes durante los primeros años de vida, llegando hasta el 80% en los mayores de 18 años diagnosticados en la infancia<sup>32,33</sup>. Entre los factores de riesgo para la



infección temprana por *P. aeruginosa*, se han descrito el sexo femenino, la infección previa por *Staphylococcus aureus*, la homocigosis de la mutación p.Phe508del y el contacto previo con pacientes adultos con FQ<sup>34</sup>. Algunos autores han señalado que cuanto más precoz se produce la infección inicial por *P. aeruginosa*, peor es el pronóstico y más rápida la evolución de la enfermedad<sup>23,35</sup>.

Las manifestaciones clínicas de la infección varían tanto en frecuencia como en intensidad. El síntoma dominante es la tos, intermitente o crónica, con un grado variable de expectoración. La infección por *P. aeruginosa* se relaciona con un mayor número de síntomas respiratorios y más exacerbaciones<sup>23,35-37</sup>. En la infección inicial (primoinfección), los pacientes suelen estar asintomáticos. En la infección bronquial crónica la población bacteriana induce una respuesta inflamatoria que se manifiesta clínicamente por expectoración purulenta persistente. Puede acompañarse de afectación sistémica, con febrícula, astenia y/o pérdida de peso<sup>38</sup>. La persistencia de recuentos elevados de *P. aeruginosa* en el tracto respiratorio se asocia con un mayor deterioro funcional y un incremento de las exacerbaciones. El cambio del morfotipo no-mucoide a mucoide se une a un menor percentil de peso, mayor número de exacerbaciones, peor función pulmonar, mayor daño estructural y mayor mortalidad<sup>23,35,39</sup>. La exacerbación se caracteriza por una agudización en la sintomatología habitual del paciente o la aparición de nuevos síntomas de infección, aunque no existen unos criterios diagnósticos homogéneos ni suficientemente validados. La tabla 2 resume las variables a considerar en su diagnóstico<sup>38,40,41</sup>.

Otras pruebas de laboratorio podrían tener utilidad para valorar la evolución de los pacientes con FQ. Niveles elevados de elastasa neutrofílica en el esputo inducido se relacionan con un deterioro más rápido de la función pulmonar<sup>42</sup>. De igual forma, una disminución de interleucina (IL)-8 se ha asociado con una buena respuesta al

tratamiento antibiótico<sup>43</sup>. Por el contrario, los niveles de óxido nítrico no están aumentados en los pacientes con FQ, a diferencia de lo que ocurre en otras enfermedades que presentan inflamación de la vía aérea. El monóxido de carbono (CO) exhalado (biomarcador de estrés oxidativo) se encuentra elevado en el aire espirado de los pacientes con FQ y se incrementa durante las exacerbaciones respiratorias; por lo que podría ser útil para valorar la evolución y respuesta al tratamiento (III-B)<sup>44</sup>. A pesar de los resultados, la evidencia disponible no permite realizar una recomendación general sobre el empleo de estos biomarcadores. Son necesarios más estudios para establecer las situaciones clínicas en las que se justificaría su determinación.

### **Consecuencias funcionales de la infección por *Pseudomonas aeruginosa***

En los pacientes con primoinfección por *P. aeruginosa* la función pulmonar puede ser normal. Las pruebas de función pulmonar son una medida indirecta de la arquitectura pulmonar y no tienen sensibilidad en caso de daño localizado o en fases precoces. Los parámetros que primero se alteran son los marcadores de hiperinsuflación, como el volumen residual (VR), el VR/capacidad pulmonar total (CPT) y los flujos mesoespiratorios. No obstante, existen nuevos parámetros capaces de detectar alteraciones mínimas. Entre ellos, el índice de aclaramiento pulmonar (LCI, *lung clearance index*), disponible en pocos centros y, por el momento, de coste elevado. Se obtiene mediante una técnica de lavado por múltiples respiraciones de un gas inerte. Es muy sensible para evaluar la heterogeneidad en la distribución de la ventilación. Se ha descrito que el LCI es más alto en pacientes con infección por *P. aeruginosa* y que existe una buena correlación con los niveles de IL-8 y con el recuento de neutrófilos del LBA. Además, un valor de LCI dentro de la normalidad tiene un elevado valor predictivo negativo (93%) para excluir la presencia de *P. aeruginosa*<sup>45</sup>. Por otro lado,

ofrece datos que indican la previsible mala evolución y adquisición temprana de *P. aeruginosa* y, consecuentemente, la necesidad de un estricto seguimiento (III-B)<sup>36,45-47</sup>.

La medición del volumen espiratorio forzado en el primer segundo (FEV<sub>1</sub>) refleja la progresión de la enfermedad y tiene una buena correlación con la mortalidad y la gravedad de las exacerbaciones (III-A). Se ha descrito que los pacientes sin infección por *P. aeruginosa*, o los que han conseguido erradicar este microorganismo, tienen una pérdida anual de FEV<sub>1</sub> (en porcentaje del teórico) del 1,65%, mientras que en los infectados de forma crónica la caída es del 4,74%<sup>48</sup>. En los sujetos con una infección crónica con recuentos elevados de *P. aeruginosa*, con morfotipo mucoso, resistente a antibióticos o con una mayor producción de anticuerpos, los valores del FEV<sub>1</sub> son significativamente más bajos y la supervivencia suele ser menor<sup>23</sup>.

La prueba de la marcha es un método útil, sencillo y objetivo para valorar la tolerancia al ejercicio, el grado de incapacidad y la respuesta a un determinado tratamiento (III-A). También es aconsejable realizar una pulsioximetría nocturna en los pacientes con peor función pulmonar (III-C). Las pruebas de ejercicio con medida de la ventilación y consumo de oxígeno son complejas y necesitan laboratorios especializados para efectuarlas<sup>49</sup>.

### **Técnicas de imagen en el paciente con infección por *Pseudomonas aeruginosa***

Se ha demostrado la sensibilidad de la tomografía computarizada (TC) de tórax para el diagnóstico precoz de la afectación de la vía aérea<sup>50</sup>. En cambio, la radiografía convencional de tórax no es sensible para detectar enfermedad precoz. Una rápida progresión del atrapamiento aéreo y de las bronquiectasias en la TC se ha asociado con la presencia de infección pulmonar, mayor inflamación neutrofílica y genotipo grave<sup>51</sup>. También se ha observado que los pacientes con infección por *P. aeruginosa* presentan un mayor daño estructural en la TC y que las peores puntuaciones en los scores de la

TC se correlacionan de manera estrecha con la adquisición de *P. aeruginosa*<sup>23,52,53</sup> y con las exacerbaciones<sup>54</sup>. La evaluación de los cambios en la TC puede ayudar a delimitar un grupo de pacientes en los que es más probable la detección precoz de *P. aeruginosa* (III-A). Asimismo, es útil, y con más precisión que las pruebas funcionales, para estimar la gravedad y progresión de la afectación pulmonar en la FQ y ayuda a valorar la respuesta al tratamiento y a tomar decisiones sobre nuevos tratamientos, ajustándolos a la gravedad de las lesiones (III-A)<sup>50,55,56</sup>. Algunos centros realizan TC de alta resolución cada dos o tres años ya que, con protocolos adecuados que utilizan mínima dosis de radiación, el riesgo se considera bajo y aceptable aunque, por el momento, no es una práctica estandarizada<sup>57</sup>. La radiografía de tórax es más utilizada en niños. En adultos queda limitada a unas pocas indicaciones, como la sospecha de complicaciones (atelectasias, neumotórax, etc.) (III-A).

En un futuro, la resonancia magnética podría tener beneficios potenciales en el seguimiento de los pacientes al tratarse de una técnica libre de radiación<sup>58</sup>.

### **Evaluación microbiológica de la infección bronquial por *Pseudomonas aeruginosa***

El estudio microbiológico de las secreciones respiratorias de los pacientes con FQ permite conocer el patrón de infección y realizar estudios de sensibilidad a los antimicrobianos en los patógenos identificados. Las particularidades del proceso hacen necesaria la puesta en marcha de procedimientos específicos<sup>59,60</sup>, actualizados en nuestro país por la Sociedad Española de Enfermedades Infecciosas y Microbiología Clínica (SEIMC)<sup>12</sup> (<http://www.seimc.org/documentos/protocolos/microbiologia/>). La muestra de elección en el estudio microbiológico es el esputo (III-A). En caso de que el paciente no pueda expectorar se pueden utilizar esputos inducidos, aspirados

bronquiales o muestras retrofaríngeas, aunque estas últimas tienen menor sensibilidad (III-A). El LBA se suele reservar para pacientes con mala evolución y sin respuesta al tratamiento (III-B). Se recomienda que el transporte de la muestra y su procesamiento (cultivo) se realicen de manera inmediata después de la toma. Asimismo la muestra se podrá, i) conservar y transportar a temperatura ambiente, si el procesamiento no se demora más de 24 h, ii) conservar en nevera (4°C) y transportar en frío cuando el procesamiento se realiza entre las 24 y 48 h después de su toma y iii) conservar a -20°C (o temperaturas más bajas) y transportar en frío (4°C), o a temperatura de congelación, si se prevé que el tiempo transcurrido entre la toma de muestra y su procesamiento va a ser superior a 48 h. No se recomienda el procesamiento de muestras conservadas o transportadas de forma inadecuada (III-A).

En general, no se recomienda la tinción de Gram, ya que no aporta información importante en el manejo del paciente con FQ y no es útil en la aceptación o rechazo del esputo en estos pacientes (III-E). Como se ha indicado con anterioridad, en la actualidad no hay suficientes datos para recomendar la utilización sistemática de técnicas moleculares para la identificación directa precoz de *P. aeruginosa* en muestras respiratorias (III-B). La detección de anticuerpos frente a *P. aeruginosa* es de poca utilidad en la infección crónica, pero, aunque existen controversias, podría ser útil en la detección temprana de la primoinfección (III-B). La presencia de niveles de anticuerpos por encima de límites previamente validados en el laboratorio que los determina, se acepta como criterio independiente de los microbiológicos en la definición de infección bronquial crónica<sup>61</sup>, y como tal, está incorporada en el Registro de Pacientes de la Sociedad Europea de FQ ([www.ecfs.eu](http://www.ecfs.eu)). En este sentido, la elevación precoz de anticuerpos séricos específicos anti-*P. aeruginosa* IgG1 e IgG4 es un factor de riesgo para el desarrollo de infección bronquial crónica<sup>62</sup>.

En los pacientes sin evidencias de infección por *P. aeruginosa* se recomienda, al menos, un cultivo trimestral de esputo (III-A). En la infección crónica, el cultivo debe realizarse siempre que se produzcan exacerbaciones y, al menos, una vez cada tres meses en los períodos en los que no existan exacerbaciones (III-A). Se recomienda, siempre que sea posible y fundamentalmente en el paciente con mala evolución, la realización de recuentos de los diferentes patógenos, ya que facilita el aislamiento de aquellos que estén en baja proporción y la detección de un mayor número de morfotipos o variantes coloniales (III-B). Aunque la información existente es aún limitada, el incremento de los recuentos bacterianos y el aumento del número de morfotipos se han relacionado con un mayor deterioro de la función pulmonar<sup>14</sup>.

### **Criterios y patrones de la infección por *Pseudomonas aeruginosa***

Habitualmente se emplea el término “colonización-infección” o “colonización patogénica” en los pacientes con FQ, para expresar la ambivalencia de *P. aeruginosa* en esta situación. Normalmente, “colonización” indica el desarrollo bacteriano sobre una superficie, sin que se derive necesariamente la producción de efectos lesivos aparentes. Aunque el término “infección” se utiliza normalmente para expresar un efecto patogénico derivado de la invasión microbiana de tejidos, en la FQ, la invasión tisular es excepcional, si bien se produce un deterioro con destrucción progresiva del epitelio bronquial. Se trata de una “colonización con efectos patogénicos”, consecuencia de la colonización de una gran superficie mucosa y de la secreción bronquial adjunta, con una gran densidad de células bacterianas, lo que se traduce en una enorme masa microbiana asociada y una respuesta inflamatoria local exacerbada. Por consenso, y en línea con otros documentos<sup>3</sup>, se ha preferido el término “infección” ya que, aunque no responde a la situación patogénica de *P. aeruginosa* en la FQ, implica una actuación terapéutica.

Desde el punto de vista microbiológico existen, básicamente, tres fases en el proceso de colonización-infección respiratoria en el paciente con FQ y que tiene consecuencias importantes en su manejo<sup>1</sup>.

**- Infección inicial (primoinfección o infección pionera).** Primer contacto de *P. aeruginosa* con el paciente que se traduce en un primer cultivo positivo. La colonización-infección inicial suele producirse por cepas no mucosas y no existe diversidad de morfotipos coloniales, ni alta resistencia a los antimicrobianos. En general, un cultivo positivo implica que la colonización ha alcanzado un nivel cuantitativo suficiente para ser detectada, aunque con frecuencia los recuentos son bajos. La presencia de cultivos negativos después de la detección de un primer cultivo positivo puede indicar: i) una colonización-infección inicial abortada, esto es, que ha sido eliminada espontáneamente, ya que no todas las cepas de *P. aeruginosa* que entran en contacto con el huésped tendrían igual capacidad de colonizar; ii) una colonización-infección inicial críptica que indicaría que se ha producido la llegada de *P. aeruginosa* a algún lugar del pulmón cuyas secreciones no están representadas en la muestra cultivada, o que está en tan escaso número que no se recupera en el cultivo; y iii) la erradicación real de *P. aeruginosa* tras el tratamiento antimicrobiano. Desde un punto de vista microbiológico, y tomando como referencia las recomendaciones de la *European Medicines Agency* (EMA) en la valoración de los resultados en los ensayos clínicos<sup>63</sup>, se considera erradicación cuando se obtienen al menos dos cultivos negativos para *P. aeruginosa* realizados a partir de 1-2 semanas tras finalizar el tratamiento y al menos separados 2-4 semanas entre sí. En caso de que vuelva a aparecer *P. aeruginosa* en los cultivos, sólo es posible constatar que se ha producido una auténtica erradicación mediante el genotipado de la cepa inicial y de las obtenidas en muestras posteriores al

tratamiento erradicador. La concordancia de éstas con la inicial oscila, en distintos estudios, entre el 25% y 75%<sup>64</sup>.

- **Infección intermitente.** Se produce después de una infección inicial y se expresa a través de cultivos consecutivos, intermitentemente positivos y negativos. Esta situación no debe ser considerada sólo como expresión de verdaderas eliminaciones y reinfecciones con la misma o distinta cepa pionera. En realidad, más comúnmente refleja: i) una infección permanente con bajos niveles cuantitativos, que puede, por azar, no ser detectada en algunos cultivos; ii) infecciones intrapulmonares secundarias (a partir de la zona inicialmente colonizada) en distintas zonas pulmonares, con heterogeneidad de la procedencia de las muestras que se cultivan, algunas de ellas representativas de zonas libres de colonización; iii) también puede ser debido a una erradicación aparente transitoria pero con colonización persistente de los senos paranasales, lo que lleva a reinfecciones intermitentes de la faringe y eventualmente de la vía aérea inferior<sup>3,65</sup>. En la infección intermitente es frecuente obtener, en los cultivos positivos, cepas mucosas y variabilidad en los morfotipos coloniales. También pueden producirse intervalos prolongados en los que los cultivos son negativos<sup>66</sup>.

- **Infección crónica.** Es la situación habitual en los periodos avanzados de la enfermedad, en la que suelen aparecer colonias mucosas y una diversidad de morfotipos. La infección crónica se produce generalmente, por la progresiva evolución adaptativa de un clon bacteriano a las condiciones ecológicas del medio endobronquial del paciente con FQ, en el que llega a especializarse. Conduce a la producción de una gran masa bacteriana que induce las consecuencias patogénicas de la colonización. Las exacerbaciones en el curso de la infección crónica, de causas mal conocidas, y en las que no se puede excluir la aparición transitoria de



variantes bacterianas de mayor virulencia, suelen coincidir con aumentos de la masa bacteriana total o con variaciones antigénicas. Como se ha comentado, una vez desarrollada la infección crónica, la erradicación del patógeno no suele ser posible. Por ello, el objetivo terapéutico en este estadio es el aclaramiento bacteriano, definido como una reducción en, al menos, dos logaritmos en los recuentos de *P. aeruginosa* cuando se comparan cultivos inmediatamente anteriores y posteriores al tratamiento. En cultivos no cuantitativos, el aclaramiento puede observarse como una reducción de la densidad bacteriana, y más raramente, por cultivos negativos. El aclaramiento cumple el objetivo esencial de reducir la masa bacteriana responsable de los efectos patogénicos de la infección crónica.

Existen múltiples criterios para definir los diferentes patrones de colonización-infección. En la tabla 3 se incluyen los criterios definidos en 2005<sup>1</sup>, pero adaptados según los de Leeds, por su simplicidad y porque han demostrado una buena correlación con los parámetros clínicos y la respuesta inmunológica<sup>22,67</sup> (II-A). Estos criterios diferencian cuatro grupos: i) pacientes que nunca han tenido cultivos positivos para *P. aeruginosa*; ii) pacientes libres de *P. aeruginosa* (todos los cultivos han sido negativos para *P. aeruginosa* en los 12 meses previos); iii) pacientes con infección intermitente por *P. aeruginosa* ( $\leq 50\%$  de cultivos positivos para *P. aeruginosa* en los 12 meses previos); iv) pacientes con infección crónica ( $> 50\%$  de cultivos positivos para *P. aeruginosa* en los 12 meses previos).

### ***Pseudomonas aeruginosa* en fibrosis quística: las múltiples caras de la resistencia antibiótica**

El tratamiento de la infección respiratoria por *P. aeruginosa* en FQ supone un reto terapéutico. Es bien conocido que una vez desarrollada la infección crónica, la erradicación del patógeno de las vías respiratorias resulta prácticamente imposible. Por

ello, el objetivo terapéutico es minimizar los efectos lesivos de la infección más que su curación. La complejidad y dificultad del tratamiento radica en la conjunción de múltiples propiedades específicas, que determinan una enorme resistencia a los tratamientos antibióticos convencionales y que hacen necesaria una aproximación terapéutica específica para este proceso. Entre éstas destacan:

i) La gran capacidad de *P. aeruginosa* para desarrollar resistencia a través de la selección de mutaciones cromosómicas<sup>70</sup>. Si bien éste es un factor común en todas las infecciones por *P. aeruginosa*, en la FQ difieren significativamente en relación a la expresión de las diferentes bombas de expulsión de antibióticos. Este hecho se traduce con frecuencia en una mayor resistencia a los antibióticos antipseudomónicos habituales, pero también determina mayor sensibilidad a otros fármacos como el aztreonam o el cotrimoxazol<sup>69,70</sup>. Esta situación no se produce en los aislados obtenidos en infecciones agudas.

ii) La elevada prevalencia de fenotipos hipermutadores. El 30-60% de los pacientes con FQ están colonizados por cepas hipermutadoras, al contrario de lo que ocurre en las infecciones agudas (<1%)<sup>71</sup>. Estas cepas presentan una tasa de mutación espontánea elevada (hasta 1000 veces superior a lo normal) que acelera, de forma notable, el desarrollo de resistencia a los antibióticos y el proceso de cronificación de la infección<sup>71,72</sup>.

iii) El característico modo de crecimiento formando biofilms (formalmente biopelículas). Los *biofilms* son comunidades bacterianas embebidas en una matriz globalmente formada por un exopolisacárido<sup>73</sup>. Estas estructuras tienen una elevada resistencia al aclaramiento mecánico, a los componentes del sistema inmunitario y a los antibióticos; se estima que cuando las bacterias crecen en forma de biofilms son entre 100 y 1000 veces más resistentes que aquellas que lo hacen de forma convencional

(planctónica)<sup>73</sup>. Estudios recientes demuestran que no sólo se trata de diferencias cuantitativas, sino que la actividad de los antibióticos puede ser cualitativamente muy diferente en función del tipo de crecimiento, llegándose a dar el caso, de antibióticos (como los macrólidos) que tienen actividad bactericida sólo cuando la bacteria crece en biofilm<sup>74</sup>. Asimismo, la colistina, al revés que la tobramicina, muestra una alta actividad bactericida frente a los microorganismos que ocupan el centro del biofilm. Por el contrario, la tobramicina tiene mayor actividad bactericida frente a la población que ocupa la periferia del biofilm. Todo ello limita la capacidad de los estudios de sensibilidad clásicos (basados en bacterias con crecimiento planctónico) para predecir la eficacia de los tratamientos en la FQ<sup>75</sup>.

iv) La intensa diversificación fenotípica y capacidad de adaptación genera poblaciones altamente heterogéneas. Se favorece por el crecimiento en biofilms, la hipermutación y la elevada compartimentalización del nicho ecológico (pulmón)<sup>76,77</sup>. La selección de variantes altamente adaptadas al pulmón FQ, como son los morfotipos mucoides o las variantes de crecimiento lento (*small colony variants*, SCV), sin ser mecanismos de resistencia clásicos, limitan drásticamente la eficacia del tratamiento. Esta situación constituye un importante reto a la hora de predecir el éxito terapéutico cuando se utilizan los estudios de sensibilidad *in vitro* clásicos.

v) Cepas y mecanismos de resistencia transferibles emergentes. El dogma general en la FQ contempla la infección crónica por una cepa única de *P. aeruginosa* adquirida de fuentes ambientales que, una vez adaptada, ya no puede erradicarse y persiste en las vías respiratorias durante toda la vida del paciente. No obstante, cada vez cobra más relevancia la sobreinfección por cepas epidémicas, altamente transmisibles, más virulentas y resistentes a los antibióticos<sup>78</sup>. La primera cepa epidémica descrita fue la LES-1<sup>79</sup>, hoy ampliamente diseminada en el Reino Unido. También se han

encontrado cepas epidémicas en otros países, incluyendo España<sup>80,81</sup>. Finalmente, cada vez son más frecuentes aislados con mecanismos de resistencia transmisibles, particularmente las carbapenemasas de clase B (o metalo- $\beta$ -lactamasas, MBL), capaces de hidrolizar todos los antibióticos  $\beta$ -lactámicos (penicilinas, cefalosporinas y carbapenemas), con la excepción de los monobactámicos (aztreonam). Los primeros casos de infección crónica por cepas mucoides productoras de carbapenemasas se describieron en España en 2008 en pacientes con bronquiectasias<sup>82</sup>. También se han descrito en Portugal, Alemania, Italia o Brasil.

### **Evaluación *in vitro* de la actividad de los antibióticos. Particularidades en la colonización crónica en FQ**

Las particularidades de la infección crónica por *P. aeruginosa* en la FQ, incluyendo la hipermutación, la enorme diversidad fenotípica, la presencia de variantes adaptadas al proceso crónico, generalmente de lento (o deficiente) crecimiento *in vitro* (cepas mucoides y SCV), y el característico desarrollo en biofilms, suponen un enorme reto en los estudios de sensibilidad convencionales que predicen la eficacia clínica de los tratamientos.

Los métodos de referencia en el estudio de sensibilidad son la microdilución y la dilución en agar, esta última no aplicable de forma rutinaria en la mayoría de los laboratorios de microbiología clínica. No obstante, las técnicas basadas en difusión con disco o difusión en gradiente (Etest® y otros sistemas comerciales similares) han mostrado buena correlación con las técnicas de referencia en cepas de FQ<sup>83</sup> y, por tanto, pueden utilizarse para este fin (III-B). Además, estas técnicas permiten detectar y analizar de forma específica la sensibilidad antibiótica de las cepas hipermutadoras<sup>82</sup>.

Los sistemas de microdilución comerciales, no muestran buena correlación con las técnicas de referencia<sup>85</sup> y no se recomienda su uso rutinario (III-D). El estudio de

sensibilidad debe realizarse de forma independiente con los diferentes morfotipos de *P. aeruginosa* identificados en el cultivo, ya que el estudio de poblaciones mixtas infravalora la resistencia (III-B)<sup>86</sup>. Aún así, varios estudios documentan una gran variabilidad en los resultados y una falta de correlación con la respuesta clínica, cuestionando su utilidad en la colonización crónica<sup>87-89</sup>. En cualquier caso, la incubación de las pruebas de sensibilidad debe prolongarse al menos hasta 24 h, para facilitar el crecimiento de las variantes mucoides y SCV (III-A).

Otra aproximación propuesta es el estudio de la sensibilidad directamente sobre las muestras de esputo<sup>90</sup>. Aunque los resultados parecen ser aceptables, todavía es necesario profundizar en su estandarización y validación antes de recomendar su uso (III-C). Asimismo, se han propuesto ensayos de sensibilidad de múltiples combinaciones de antibióticos bactericidas (*multiple combination bactericidal antibiotic susceptibility testing*, MCBT). No obstante, un ensayo clínico aleatorizado doble-ciego concluyó que su utilización no mejora la evolución clínica y, por tanto, debido a su complejidad, no se recomienda su uso sistemático (I-D)<sup>91</sup>.

Un aspecto relevante a tener en cuenta son los puntos de corte (*breakpoints*) utilizados para definir las categorías clínicas “sensible”, “intermedio” y “resistente”. En Europa, se utilizan los puntos de corte definidos para infección sistémica establecidos por el comité europeo del antibiograma EUCAST (*European Committee on Antimicrobial Susceptibility Testing*) (<http://www.eucast.org>), representado en nuestro país por el Comité Español del Antibiograma (COESANT, <http://www.coesant-seimc.org/>). Sin embargo, no están adaptados a las concentraciones de antibiótico logradas por vía inhalada, claramente superiores a las obtenidas por vía sistémica. Este hecho hace necesaria la definición de puntos de corte específicos para esta vía de administración. Si bien las agencias oficiales no han abordado por el momento esta

cuestión, hay estudios que recomiendan puntos de corte específicos para esta vía; para la tobramicina el punto de corte de sensibilidad pasaría de  $\leq 4$  mg/L para la vía sistémica a  $\leq 64$  mg/L para la vía inhalatoria(III-B)<sup>92</sup>. Para otros antibióticos administrados por vía inhalada, como la colistina o el aztreonam, no existen recomendaciones específicas, pero la situación podría ser muy similar a la de la tobramicina.

Asimismo, se debe tener en cuenta el tipo de crecimiento utilizado en el estudio in vitro. *P. aeruginosa* crece formando biofilms en el pulmón del paciente con FQ, pero los estudios estandarizados de sensibilidad miden la actividad antimicrobiana en crecimiento planctónico. Varios trabajos han demostrado que hay escasa concordancia entre los resultados de sensibilidad antibiótica obtenidos en ambos tipos de crecimiento y que, por tanto, la utilización de uno u otro tendría un impacto escaso en la elección del tratamiento<sup>93,94</sup>. En un ensayo clínico piloto, multicéntrico aleatorizado, para determinar la eficacia y seguridad del tratamiento guiados por el estudio de sensibilidad en biofilms, comparado con el procedimiento convencional<sup>95</sup>, no se encontraron diferencias entre ambos grupos por lo que no puede recomendarse la utilización de esta metodología de forma rutinaria (I-C).

El último consenso europeo concluye que los estudios de sensibilidad a los antibióticos probablemente no son útiles en la práctica clínica habitual en la selección de los antibióticos a utilizar en el tratamiento intravenoso de las exacerbaciones agudas o en la antibioterapia inhalada crónica en los pacientes con infección crónica. No obstante, se deben considerar en la monitorización de cepas multirresistentes junto con su genotipado, la caracterización de aislados de *P. aeruginosa* en los pacientes no colonizados y en el cambio del tratamiento antibiótico, en caso de respuesta clínica inadecuada<sup>4</sup> (III-C).

## **Fundamentos y estrategias de la profilaxis y el tratamiento antimicrobiano**

El tratamiento antimicrobiano frente a *P. aeruginosa* continúa siendo la piedra angular para controlar la progresión de la enfermedad respiratoria y el deterioro de la función pulmonar. La erradicación de los microorganismos y, en particular, de *P. aeruginosa* se consigue en pocas ocasiones después de establecida la infección crónica, por lo que es más eficaz tratar lo más precozmente posible (I-A). Aunque se utiliza tanto la vía oral como la intravenosa, la vía inhalada es referencia en el tratamiento del paciente con FQ<sup>14,17,96,97</sup>. En la tabla 4 se incluyen los antimicrobianos con formulación específica para la vía inhalada que, a fecha de la redacción de este documento, están comercializados en España. La colistina nebulizada fue el primer fármaco que se utilizó de forma sistemática en nuestro país en la FQ. Al ser un fármaco más antiguo, su uso se ha instaurando de forma progresiva sin ensayos clínicos randomizados y aleatorizados. Por este motivo en las recomendaciones basadas en evidencias científicas su puntuación es diferente a la de la tobramicina y el aztreonam, antimicrobianos de más reciente comercialización, en cuyo proceso ha sido necesario este tipo de estudios. A pesar de que el nivel de evidencia es menor que el de los nuevos fármacos, el nivel de recomendación de la colistina es alto, siendo el tratamiento nebulizado mas empleado en nuestro país.

### **Fundamentos del tratamiento antimicrobiano**

El objetivo terapéutico del tratamiento antimicrobiano en la FQ es la erradicación de *P. aeruginosa*. Con las pautas actuales, sólo se consigue de manera efectiva en la infección inicial. En la infección crónica y en las exacerbaciones, en ausencia de erradicación, el objetivo terapéutico es el aclaramiento o la reducción de la carga bacteriana y como consecuencia de ello, de la respuesta inflamatoria<sup>1</sup>. El particular nicho en el que se sitúa

*P. aeruginosa* en la FQ, su tendencia natural a formar biopelículas y las dificultades de algunos antimicrobianos en alcanzar concentraciones eficaces en la mucosa respiratoria, cuando se administran por vía oral o intravenosa, han favorecido que el tratamiento antimicrobiano en estos pacientes se centre en la vía inhalada. Asimismo, la ausencia de erradicación durante la infección crónica condiciona un tratamiento supresivo de larga duración, bien de forma continua con colistina, o en ciclos de 28 días (ciclos *on-off*) con tobramicina o aztreonam. Este último esquema de tratamiento, iniciado con la tobramicina no fenólica para inhalación<sup>98</sup>, se fundamenta en conseguir concentraciones elevadas en el lugar de la infección durante un tiempo prolongado (período *on* de 28 días) que disminuya los recuentos bacterianos, seguido de un periodo *off* de descanso (28 días sin presión antibiótica) que recupere las poblaciones bacterianas sensibles, en detrimento de los posibles mutantes resistentes que pudiesen haberse seleccionado durante el período *on*. Otras formulaciones de antimicrobianos, específicas para la vía inhalada, como el aztreonam, han sido comercializadas con idéntico esquema de ciclos *on-off*<sup>13,99</sup>. Con ellas se consigue además, una menor toxicidad que con la administración sistémica y un menor riesgo de selección de mutantes resistentes por las elevadas concentraciones que se alcanzan aunque debe vigilarse la posible emergencia de otras bacterias oportunistas diferentes de *P. aeruginosa*.

La farmacocinética de los antimicrobianos en el paciente con FQ difiere de la que caracteriza a los individuos sin esta enfermedad<sup>16,100-102</sup>. La biodisponibilidad y la fijación a proteínas plasmáticas no se modifican significativamente en el paciente con FQ. Sin embargo, el volumen de distribución (*Vd*) es comparativamente más elevado para los fármacos hidrosolubles, como los  $\beta$ -lactámicos y aminoglucósidos, respecto a la población sin FQ. Esta diferencia se debe, en parte, a la menor presencia de tejido magro<sup>100,103,104</sup>. Otra alteración en estos pacientes es el mayor aclaramiento (*Cl*) de



muchos fármacos debido a un mayor aclaramiento renal ( $Cl_R$ ) y grado de filtración glomerular (GFR), a la disminución tanto de la fijación a las proteínas del plasma como a la reabsorción tubular y al incremento del aclaramiento extrarrenal (metabolismo y vías de eliminación no renal). A su vez, los pacientes con FQ pueden tener un aclaramiento hepático aumentado. Esta modificación tiene relevancia en los antimicrobianos eliminados, en parte o en su totalidad, por metabolismo hepático como el cotrimoxazol, las fluoroquinolonas y algunas penicilinas como la cloxacilina<sup>104</sup>.

En el paciente con FQ, al menos con los  $\beta$ -lactámicos y los aminoglucósidos, se debe incrementar un 20-30% la dosis habitual utilizada por vía oral y parenteral<sup>104</sup> (Tabla 5). Con los aminoglucósidos, el problema de la toxicidad a nivel renal o coclear se minimiza con la administración parenteral de una dosis diaria única. Esta forma de administración es además ventajosa, desde el punto de vista de los valores de los índices PK/PD, ya que son antibióticos con actividad concentración dependiente y, por tanto, con mayor probabilidad de alcanzar el objetivo terapéutico cuando se utilizan a mayor dosis<sup>105,106</sup>. Este objetivo se consigue más fácilmente cuando el aminoglucósido se administra por vía inhalada, ya que se logra una elevada concentración en el lugar de la infección. Las concentraciones séricas de tobramicina tras su administración inhalada (300 mg) son, de media, inferiores a 1 mg/L, mientras que las que se alcanzan en el esputo pueden superar los 1.200 mg/L<sup>107</sup>. Estos valores explican la baja toxicidad demostrada por vía inhalada. Por ejemplo, en los estudios realizados frente a placebo con tobramicina nebulizada, la creatinina plasmática permanece inalterada al cabo de 92 semanas de observación. Además, su efecto postantibiótico prolonga el efecto antimicrobiano aunque la concentración sea inferior a la CMI<sup>105</sup>.

Las fluoroquinolonas son también antimicrobianos con actuación concentración dependiente. Los parámetros PK/PD que mejor definen su actividad son  $C_{max} > CMI$  y

el área bajo la curva por encima de la CMI ( $AUC > CMI$ ). Tanto para ciprofloxacino como levofloxacino, las dosis que se utilizan son más elevadas que en procesos infecciosos en otra localización anatómica (tabla 5). Estas dosis confieren mayor seguridad de alcanzar el objetivo terapéutico y un menor riesgo de selección de mutantes resistente<sup>16,108</sup>.

Los antibióticos  $\beta$ -lactámicos son tiempo-dependientes y, por ello, para obtener un mejor efecto terapéutico, se requiere el mantenimiento de concentraciones por encima de la CMI durante periodos prolongados de tiempo ( $T > CMI$ ). Por vía intravenosa se consigue con la perfusión extendida (o infusión continua según la estabilidad) para algunos antimicrobianos como piperacilina/tazobactam, ceftazidima, cefepima, meropenem o doripenem. Estos fármacos requieren que las concentraciones plasmáticas se mantengan por encima de la CMI durante, al menos, un 40-50% del intervalo entre la administración de la dosis<sup>101,109</sup>. Por vía inhalada, y en el caso del aztreonam, la eficacia es mayor cuando se administra tres veces al día, en comparación con dos administraciones<sup>99</sup>.

Para la colistina los datos acerca de los parámetros PK/PD, aunque escasos, muestran que es un fármaco con actuación tiempo-dependiente y por lo tanto, puede utilizarse dos o tres veces al día<sup>17,110-112</sup>. Su administración sistémica no está exenta de toxicidad, muy infrecuente por la vía inhalada. Asimismo, los estudios realizados en pacientes tratados con nebulizaciones de colistina, incluso durante tres décadas, muestran que *P. aeruginosa* conserva la sensibilidad a este antimicrobiano<sup>113</sup>.

En general, se recomienda utilizar por vía inhalada las preparaciones galénicas específicas para esta vía, que son muchos los factores que deben ponderarse para realizar esta formulación (molaridad, pH, concentración salina y del antimicrobiano,

ausencia de conservantes, etc.), así como los posibles efectos adversos a nivel local (broncoespasmo) (III-A).

### **Prevención de la infección: profilaxis antimicrobiana, segregación de pacientes y vacunación**

La profilaxis con antibióticos antipseudomonas administrados antes del primer aislado de *P. aeruginosa*, no ha demostrado que disminuya el riesgo de infección crónica por esta bacteria<sup>114</sup>, por lo que no se recomienda esta práctica (I-A). La segregación de pacientes con *P. aeruginosa* se considera una estrategia de prevención eficaz (III-A)<sup>115,116</sup>. Asimismo, se ha evaluado la inmunización pasiva, aunque no hay datos concluyentes que permitan afirmar que la vacunación frente a *P. aeruginosa* proteja frente a esta infección (I-A)<sup>117</sup>.

### **Tratamiento de la primoinfección (primer aislado) por *Pseudomonas aeruginosa***

Se ha demostrado el beneficio del tratamiento precoz con antibióticos en la primoinfección por *P. aeruginosa* ya que retrasa la infección broncopulmonar crónica por esta bacteria (I-A). El tratamiento erradicador debe iniciarse tan pronto se aísle *P. aeruginosa* en una muestra respiratoria, ya que consigue altas tasas de erradicación (entre un 63-100%)<sup>48,118-124</sup>. La mayoría de los centros de FQ lo han estandarizado en guías clínicas y documentos de consenso y existe experiencia clínica suficiente para justificar su utilidad<sup>1,3,64</sup>.

Los protocolos de erradicación publicados son muy variados, con estrategias que incluyen antibióticos inhalados, orales e intravenosos. Hasta la fecha ningún protocolo ha demostrado una clara superioridad sobre otro, por lo que debe elegirse aquel que tenga mejor coste-efectividad y coste-beneficio (I-A)<sup>3,64,96</sup>. Tampoco se conoce la duración óptima del tratamiento precoz frente a *P. aeruginosa*. Los estudios publicados

son difíciles de comparar debido a las diferencias de diseño, características de los pacientes, tipos y regímenes de antibióticos, muestras analizadas, incluyendo anticuerpos séricos específicos, tiempo de seguimiento y definición de erradicación<sup>122</sup>.

La mayoría de las primoinfecciones son asintomáticas. No obstante, si el paciente tiene una exacerbación causada por la primoinfección por *P. aeruginosa*, se recomienda utilizar el mismo esquema terapéutico que para la exacerbación respiratoria (ver más adelante).

El grupo danés, pionero en el tratamiento precoz de *P. aeruginosa*, realizó un estudio retrospectivo y randomizado sobre la eficacia del tratamiento de la infección inicial con colistina nebulizada, dos veces al día, asociada a ciprofloxacino oral, durante un tiempo que varió entre 3 semanas y 3 meses, en una cohorte de pacientes seguida durante 15 años<sup>125,126</sup>. Se observó una disminución significativa de la infección crónica por *P. aeruginosa* en los pacientes tratados, respecto a aquellos que no recibieron tratamiento.

En diferentes estudios se ha demostrado que la administración de la solución de tobramicina para inhalación, a dosis de 300 mg/5 mL cada 12 horas (TNS, TOBI<sup>®</sup>, Novartis) es eficaz y segura para erradicar *P. aeruginosa*, incluso en niños de entre 6 meses y 6 años de edad<sup>121,123,127,128</sup>. En el estudio ELITE (*EarLy Inhaled Tobramycin for Eradication*), Ratjen y cols.<sup>123</sup> compararon la eficacia y seguridad de TNS (300 mg/5 mL) en dos estrategias de tratamiento, de 28 o de 56 días, ante el primer aislado de *P. aeruginosa* en una muestra respiratoria. Ambas mostraron una eficacia y seguridad similares. Más del 90% de los pacientes negativizó *P. aeruginosa* al final del inicio del tratamiento con ambas pautas y la mayoría (69%) continuó sin infección por este patógeno a los 27 meses. Éste y otros trabajos orientarían a un tratamiento nebulizado erradicador de corta duración (de uno a tres meses) (II-A)<sup>122,126,129</sup>.

En el estudio EPIC (*Early Pseudomonas Infection Control*)<sup>127</sup>, los pacientes, de 1 a 12 años de edad, se aleatorizaron a uno de los siguientes cuatro regímenes de tratamiento durante 18 meses: a) terapia cíclica con TNS combinada con ciprofloxacino oral cada 3 meses; b) terapia cíclica con TNS combinada con placebo oral, cada 3 meses; c) terapia con TNS combinada con ciprofloxacino oral, sólo cuando se aislaba *P. aeruginosa* en los cultivos de esputo realizados cada tres meses; y d) terapia con TNS combinada con placebo oral, sólo cuando se aislaba *P. aeruginosa* en los cultivos de esputo realizados cada tres meses. El tratamiento con TNS (300 mg/5 mL) fue de 28 días seguido de 28 días de descanso, durante los 18 meses del estudio y el de ciprofloxacino o placebo oral fue de 14 días. No hubo diferencias estadísticamente significativas entre los grupos en la proporción de cultivos positivos a *P. aeruginosa*, ni en la frecuencia de exacerbaciones, por lo que la asociación de ciprofloxacino oral podría no añadir ventajas al tratamiento inhalado con TNS<sup>127</sup>.

Taccetti y cols., comparando dos esquemas terapéuticos [TNS (300 mg/5 mL o 300 mg/4 mL)] con ciprofloxacino oral frente a colistina nebulizada (2 MUI, dos veces al día) con ciprofloxacino oral, ambos durante 28 días, encontraron que ambas pautas tenían una eficacia similar en la erradicación de *P. aeruginosa*<sup>122</sup>.

Recientemente se han publicado los resultados del estudio ALPINE (*Aztreonam Lisine for Pseudomonas Infection Eradication*), con aztreonam lisina para inhalación (AZLI, Cayston<sup>®</sup>, Gilead), 75 mg, tres veces al día durante 28 días, como tratamiento precoz de la primoinfección en pacientes de >3 meses y menos de 18 años<sup>129</sup>. El 89,1% de los pacientes tratados con AZLI negativizó *P. aeruginosa* al final del tratamiento y el 75,2% y 58,2% permanecieron sin PA a los 28 días y 6 meses, respectivamente, de su finalización.

Por tanto, se aconseja iniciar el tratamiento con un antibiótico inhalado durante 28 días con TNS (300 mg, 2 veces al día) (I-A), con colistina un mes (0,5-2 millones de unidades, dos o tres veces al día, según el dispositivo de nebulización y la edad del paciente) (I-A) o con AZLI (75 mg, tres veces al día) durante 28 días (II-A) en asociación o no con ciprofloxacino por vía oral (15-20 mg/kg, 2 veces al día) (máximo 2 g/día), durante 2-3 semanas, con independencia de la edad del paciente. En algunos casos el tratamiento precoz de erradicación de *P. aeruginosa* fracasa a pesar de un buen cumplimiento. Se postulan muchos factores, tanto del huésped como de la bacteria<sup>65,130-132</sup>. Por este motivo, se debe realizar un cultivo de control 1-2 semanas tras finalizar el tratamiento de erradicación y valorar el resultado: a) si el cultivo es negativo, se debe prolongar el tratamiento establecido; su duración no está estandarizada y puede variar desde un ciclo de 28 días a tres ciclos en total en régimen *on-off*, con TNS o con AZLI (máximo 3-6 meses) o, en el caso de la colistina, 3-6 meses de forma continua (II-A) y b) si el cultivo es positivo, se repetirá un nuevo ciclo de tratamiento con la misma pauta, o se cambiará por otra combinación (ciprofloxacino más un antibiótico inhalado no utilizado en el primer ciclo) (III-A). Tras la finalización del segundo ciclo, se realizará un nuevo cultivo y si continúa siendo positivo, se aplicará el protocolo terapéutico de la infección crónica (I-A) con un seguimiento microbiológico de, al menos, un cultivo de seguimiento cada tres meses (III-A). La asociación de ciprofloxacino al tratamiento inhalado persigue aumentar la eficacia antimicrobiana en base a resultados microbiológicos *in vitro*, ya que los estudios en pacientes no han demostrado mayor efectividad del tratamiento combinado (oral mas inhalado) sobre la monoterapia (inhalado)<sup>122,133</sup>.

Aunque no hay datos concluyentes sobre el número de veces que deben repetirse los ciclos de erradicación tras un primer fracaso, en el estudio EPIC se repitió el mismo

ciclo en los pacientes en los que había persistido *P. aeruginosa* al finalizar el primer tratamiento. La tasa de fracaso fue baja por lo que repetir la misma pauta puede ser razonable. En aquellos pacientes en los que persista *P. aeruginosa* a pesar de la segunda pauta erradicadora, se podría intentar otra estrategia diferente, por ejemplo antibióticos inhalados e intravenosos simultáneamente (I-B), o bien, aplicar el protocolo de la infección broncopulmonar crónica (I-A)<sup>3</sup>.

Finalmente, es importante resaltar que si la aparición de *P. aeruginosa* tiene lugar después de uno o más años de haber obtenido cultivos negativos, se considerará esta situación como una nueva primoinfección (III-A).

### **Tratamiento en la infección crónica**

La administración prolongada de antibióticos ha demostrado plenamente su eficacia en el tratamiento de la infección crónica por *P. aeruginosa* (I-A)<sup>134</sup>. La vía de elección es la inhalada, al ser la más eficaz y segura, pues permite alcanzar altas concentraciones del fármaco en las vías aéreas inferiores con mínima absorción sistémica (I-A)<sup>7,135</sup>. El colistimetato de sodio ha demostrado su eficacia cuando se administra por vía nebulizada como tratamiento de la infección bronquial crónica por *P. aeruginosa* (III-A)<sup>2</sup>, siendo el primer antibiótico nebulizado con el que se realizó un ensayo clínico doble ciego, controlado con placebo, aunque no aleatorizado, en el que los sucesivos pacientes fueron asignados a los brazos de colistina y de placebo<sup>136</sup>. Debido a que se emplea desde hace más de 20 años, sobre todo en Europa, no se han realizado grandes ensayos clínicos posteriores a su registro<sup>7</sup>. En España existen dos preparados diferentes (Colistimetato de sodio GES<sup>®</sup>, G.E.S. Genéricos Españoles Laboratorio y Promixin<sup>®</sup>, Praxis Pharmaceutical). La dosis empleada habitualmente en adultos es de 0,5-2 millones de UI, 2-3 veces al día, mientras que en niños es de un millón de UI/2-3 veces al día. No obstante, con la utilización del nebulizador I-neb de Respironics<sup>®</sup> la dosis

puede reducirse a la mitad, al liberarse la medicación sólo durante la inspiración del paciente y no de forma continua, como con el resto de nebulizadores. Este fármaco, a diferencia de la tobramicina inhalada, se utiliza sin periodos de descanso. En un ensayo clínico de corta duración, realizado en pacientes que, en su mayoría, estaban previamente en tratamiento con colistimetato de sodio, se comparó con TNS. En este estudio, el descenso del recuento de *P. aeruginosa* fue significativo en ambos grupos, aunque sólo objetivó una mejoría estadísticamente significativa de la función pulmonar con TNS y no con colistimetato de sodio<sup>137</sup>.

El colistimetato de sodio en polvo seco (Colobreathe<sup>®</sup>, Forest Laboratories) (125 mg dos veces al día), se ha desarrollado recientemente para el tratamiento de la infección bronquial crónica por *P. aeruginosa* en pacientes con FQ, de 6 o más años de edad<sup>114</sup>, demostrando seguridad y no inferioridad respecto a TNS, a las 24 semanas de tratamiento. A fecha de este documento no está comercializado en España (Tabla 4).

También se ha demostrado que TNS (300 mg/5 mL), dos veces al día, en periodos de 28 días de tratamiento y 28 días de descanso (*on-off*), mejora significativamente el FEV<sub>1</sub>, disminuye la densidad de *P. aeruginosa* en el esputo, reduce las hospitalizaciones y el uso de antibióticos endovenosos (I-A)<sup>98</sup>. También disminuye las exacerbaciones, incluso en pacientes con afectación pulmonar leve-moderada<sup>138</sup> y mejora la calidad de vida<sup>139</sup>. TNS se tolera bien con escasos efectos adversos, siendo los más frecuentes el *tinnitus*, la alteración de la voz y los problemas orofaríngeos. La pauta recomendada consiste en la administración, por vía inhalada, de 300 mg de tobramicina dos veces al día, alternando ciclos de tratamiento y de descanso de 4 semanas de duración. En un estudio reciente que examina los pacientes del registro americano de FQ, se sugiere que esta formulación de tobramicina reduce la mortalidad de los pacientes con infección pulmonar crónica por *P. aeruginosa*<sup>140</sup>. Existe otra



formulación nebulizada de tobramicina (Bramitob<sup>®</sup>, Chiesi) con la misma dosis y posología, pero más concentrada (300 mg/4 mL), con lo que se reduce el tiempo de nebulización<sup>141</sup>.

Recientemente, se ha aprobado un nuevo formato de tobramicina en polvo seco (TIP<sup>™</sup>, TOBI<sup>®</sup> Podhaler<sup>®</sup>, Novartis), que no precisa manipulación ni conservación en nevera y requiere un menor tiempo de administración que con TNS con nebulizadores tipo jet. Su eficacia y tolerabilidad es similar a la TNS aunque con una mayor incidencia de tos<sup>142,143</sup>. La dosis recomendada es de 112 mg de tobramicina (4 cápsulas de 28 mg), administrada dos veces al día, en periodos *on-off* (28 días de tratamiento y 28 días de descanso).

Mas recientemente, se ha incorporado el primer  $\beta$ -lactámico inhalado (aztreonam lisina para inhalación, AZLI, Cayston<sup>®</sup>, Gilead) para el tratamiento de pacientes con infección crónica por *P. aeruginosa*, de 6 o más años de edad. La dosis recomendada es de 75 mg, tres veces al día, en periodos *on-off* de 28 días de tratamiento y 28 días de descanso<sup>99,144</sup>. En un ensayo abierto, de grupos paralelos, en que se comparó AZLI con TNS (300 mg/5 mL), AZLI mostró superioridad estadística respecto a la función pulmonar y una reducción de las exacerbaciones respiratorias a lo largo de 24 semanas de tratamiento. Los pacientes tratados con AZLI presentaron menos hospitalizaciones y eventos respiratorios con necesidad adicional de antibióticos con actividad anti *P. aeruginosa* (I-A)<sup>145</sup>. El tratamiento comparativo fue seguido de un periodo de extensión de 24 semanas, en diseño abierto, con 3 ciclos de AZLI. Los beneficios obtenidos durante los primeros seis meses del estudio se mantuvieron en el grupo tratado previamente con AZLI. Además, la función pulmonar se incrementó de manera significativa y se mantuvo durante el resto del estudio en los pacientes tratados previamente con TNS y que cambiaron después a AZLI.

Los ensayos comparativos de antibióticos inhalados tienen limitaciones y ninguno de los comentados incluye pacientes *naïve* para los antibióticos ensayados. En el estudio comparativo AZLI con TNS, los pacientes no habían sido tratados previamente con aztreonam, si bien el 90% de ellos habían sido tratados con TNS durante el último año y un 31% de los pacientes tenían *P. aeruginosa* multirresistente, no especificándose las resistencias previas a AZLI, ni a TNS<sup>145</sup>. En el estudio comparativo de colistimetato de sodio con TNS, el 85% de los pacientes habían recibido tratamiento previo con colistimetato de sodio y sólo un 5% con TNS<sup>138</sup>. Sin embargo, estos estudios sugieren que la adición, o rotación de antibióticos de familias diferentes, con distintos mecanismos de acción, o la combinación entre ellos, pueden ser estrategias de futuro para mantener la función pulmonar de los pacientes.

En resumen, las opciones terapéuticas para la infección bronquial crónica por *P. aeruginosa* son diversas e incluyen la terapia antibiótica inhalada intermitente, con periodos de 28 días de tratamiento y 28 de descanso, con TNS o con AZLI, o el tratamiento continuo con colistimetato de sodio (Tabla 6). Aunque algunos estudios tienen limitaciones metodológicas y son difíciles de interpretar, en los ensayos comparativos, el colistimetato de sodio en polvo seco no ha mostrado inferioridad respecto a TNS a 24 semanas de tratamiento. El AZLI ha mostrado superioridad en pacientes sin exposición previa a este antibiótico, con respecto a TNS, a 24 semanas de tratamiento

Las evidencias demostradas en los diferentes ensayos y la constatación de que la mayoría de los beneficios conseguidos en el periodo de tratamiento disminuyen durante los periodos de descanso<sup>98,99,145</sup>, han llevado a plantear otras opciones terapéuticas. Así, en los pacientes en los que la gravedad de su enfermedad no les permite tolerar los periodos *off*, se podrían emplear los antibióticos inhalados de manera continua,

alternándolos/rotándolos, sin periodos de descanso entre ellos, en lugar de utilizar un solo antibiótico con periodos de descanso o, incluso, acortar los periodos de tratamiento (por ejemplo ciclos *on-off*, 14 días de tratamiento y 14 días de descanso) (III-A)<sup>146</sup>. Las combinaciones de antibióticos en la infección bronquial crónica por *P. aeruginosa* han demostrado eficacia en observaciones *in vitro* y en experimentos en animales<sup>147</sup>.

Se recomienda que los antibióticos inhalados se administren, preferiblemente, con los nebulizadores con los que se hayan realizado los ensayos clínicos, debiendo entrenarse adecuadamente a los pacientes en su utilización, limpieza y mantenimiento (III-A). Los efectos secundarios más frecuentes suelen ser broncoespasmo y aumento de la disnea o molestias torácicas, por lo que se recomienda la administración de un broncodilatador de acción rápida antes de su utilización. En los pacientes tratados con antibióticos inhalados ototóxicos o/y nefrotóxicos, debería hacerse un control anual de la función renal y auditiva.

### **Tratamiento de las exacerbaciones**

Las exacerbaciones pulmonares en los pacientes con FQ se asocian con un deterioro de la función pulmonar y de la calidad de vida pero, además, aumentan la mortalidad. En los lactantes y preescolares, la presentación clínica puede ser más sutil. A pesar de jugar un papel central en la progresión de la enfermedad, no existe una definición consensuada de exacerbación<sup>148,149</sup> y su diagnóstico continúa siendo esencialmente clínico. En general se acepta que, si el paciente presenta 2 o más de los síntomas o signos incluidos en la Tabla 2, debería recibir de forma precoz tratamiento antimicrobiano (III-A)<sup>1,148</sup>.

El número de agudizaciones es importante en la historia natural de la enfermedad, tanto en términos de gravedad clínica como de pronóstico<sup>150</sup>. Se recomienda registrar en la historia clínica el número de exacerbaciones desde la última

visita, así como el tiempo transcurrido entre cada una, puesto que ambos parámetros tienen un fuerte impacto en el deterioro de la función pulmonar.

Aunque la elección del tratamiento empírico se basa generalmente en los estudios de sensibilidad obtenidos en la última muestra respiratoria (III-A), la sensibilidad *in vitro* no siempre se correlaciona adecuadamente con la respuesta clínica. Tradicionalmente, se han empleado dos antimicrobianos con diferente mecanismo de acción, para el tratamiento de las exacerbaciones causadas por *P. aeruginosa* en los pacientes con FQ, con el objetivo de favorecer la actividad antimicrobiana y reducir la selección de mutantes resistentes. Aunque no hay evidencia suficiente que apoye tal práctica, diferentes guías clínicas y consensos recomiendan la biterapia antibiótica en las exacerbaciones causadas por este microorganismo, al menos en las exacerbaciones graves o en los pacientes con afectación pulmonar de mayor gravedad (III-C).<sup>1,4</sup> En las exacerbaciones leves-moderadas debe iniciarse el tratamiento con ciprofloxacino (15-20 mg/kg/12 h, 2-3 semanas) por vía oral (III-B)<sup>149</sup>. En las exacerbaciones graves, o cuando el tratamiento oral no haya sido efectivo, suele recomendarse una combinación de dos antibióticos: un  $\beta$ -lactámico antipseudomónico [cefalosporina (ceftazidima o cefepima) o penicilina (piperacilina/tazobactam), monobactámico (aztreonam) o un carbapenem (imipenem, meropenem o doripenem)] en combinación con un aminoglucósido (habitualmente tobramicina)<sup>149</sup>, o con una fluoroquinolona a dosis elevadas (II-B). El colistimetato de sodio también ha demostrado su eficacia cuando se administra por vía intravenosa, solo o en combinación con otro antibiótico antipseudomónico (III-A)<sup>2,151</sup>. No obstante, requiere dosis elevadas (no exentas de toxicidad) y administrarse cada 8 horas. Debe vigilarse la función renal durante su administración. Suele reservarse para casos de aislamiento de cepas multirresistentes, o de fracaso de los tratamientos antipseudomónicos habituales.

No hay evidencias suficientes para recomendar la continuación o supresión del antibiótico inhalado en los pacientes tratados con la misma clase de antibiótico por vía endovenosa<sup>5</sup>, pero habrá que considerar que la posible absorción del antibiótico por vía inhalada puede aumentar su toxicidad, debiendo tener especial precaución en los pacientes con insuficiencia renal tratados con aminoglucósidos por vía endovenosa y con terapia de mantenimiento con TNS (III-C). Tampoco hay evidencias para recomendar el tratamiento de las exacerbaciones pulmonares sólo con antibióticos inhalados, por lo que se desaconseja tal práctica (III-D).

Deben emplearse dosis altas de antibióticos (Tabla 5), por la dificultad que tienen para penetrar en las espesas secreciones respiratorias y porque algunos antibióticos, especialmente los aminoglucósidos, tienen un aclaramiento renal más rápido en los pacientes con FQ<sup>16,101,105</sup>.

Aunque los  $\beta$ -lactámicos son antibióticos con actividad tiempo-dependiente, como no hay evidencia suficiente para recomendar su administración en infusión continua, se sigue recomendando la dosificación intermitente (II-C)<sup>4</sup>. En el caso de los aminoglucósidos, se recomienda su administración una vez al día (B-II), debido a que hay evidencia de que, con esta posología, existe menor riesgo de daño renal en niños, con igual eficacia que cuando se emplean en dos o tres dosis<sup>152</sup>. A pesar de estas recomendaciones previas, en adultos no existe un criterio unánime o evidencias para utilizar los aminoglucósidos en dosis única diaria o dos-tres dosis al día. El tratamiento con estos fármacos debe monitorizarse con niveles en sangre y función renal (III-A). Si los ciclos con aminoglucósidos son frecuentes, deberían realizarse audiometrías (III-A).

Aunque no hay evidencia suficiente para determinar el tiempo exacto que debe durar el tratamiento ante una exacerbación<sup>153</sup>, se recomienda que se mantenga hasta la resolución de la sintomatología y recuperación de la función pulmonar (C-III).

Habitualmente, se consigue tras dos semanas<sup>154</sup>, excepto en el caso de *P. aeruginosa* multirresistente, o de pacientes con afectación pulmonar muy grave o con enfermedad hepática o diabetes, en los que puede ser necesario prolongar el tratamiento.

Si bien hay pocos estudios sobre su eficacia, el tratamiento endovenoso domiciliario proporciona mayor calidad de vida al paciente y puede ser coste-efectivo (III-A). La decisión de efectuarlo debe basarse, principalmente, en la situación del paciente y en los recursos disponibles en la Unidad de FQ<sup>155</sup>. Por último, se recomienda incrementar la fisioterapia respiratoria durante las exacerbaciones y mantener el resto de las terapias crónicas (III-A)<sup>4</sup>.

## Tratamiento antiinflamatorio

Un factor dominante y característico en las vías respiratorias de los pacientes con FQ es la intensa respuesta inflamatoria neutrofílica que, si bien inicialmente trata de frenar la infección, acaba siendo por sí misma excesiva y dañina<sup>156</sup>. La introducción precoz de un tratamiento antiinflamatorio podría limitar sus efectos dañinos, retrasar la progresión del deterioro pulmonar y reducir la morbilidad y mortalidad<sup>157</sup>. Las estrategias utilizadas hasta la fecha se detallan a continuación:

- **Macrólidos.** Son fármacos capaces de modular la producción de citoquinas y la respuesta inmune, inhibir la síntesis de proteínas bacterianas, reducir la formación de biofilms y atenuar los factores de virulencia<sup>158,159</sup>. Su efectividad ha sido demostrada en múltiples ensayos clínicos, siendo la azitromicina el fármaco de elección, aunque faltan estudios valorando sus efectos a largo plazo, sobre todo en niños diagnosticados por cribado neonatal. Una revisión sistemática reciente<sup>160</sup> concluye que el tratamiento con azitromicina durante 6 meses, mejora la función pulmonar y reduce el número de exacerbaciones. La dosis más baja con eficacia

probada es de 22-30 mg/kg/semana. Puede ser administrada repartida entre una y siete dosis/semana según la tolerancia y preferencia del paciente<sup>161-163</sup>. Se aconseja, como en otras guías<sup>134,162</sup>, utilizar azitromicina oral en todos los pacientes con FQ, mayores de 6 años, fundamentalmente infectados por *P. aeruginosa*, 3 días/semana, en una sola dosis diaria (10 mg/kg en pacientes con peso <40 kg o 500 mg en >40 kg)<sup>6,161</sup> (I-B). Debido al comienzo lento de su acción (al menos 2 meses), se requiere un periodo mínimo de 4-6 meses de tratamiento<sup>162</sup>, no debiendo iniciarse si existe infección bronquial por micobacterias no tuberculosas, ya que los macrólidos son parte del régimen terapéutico frente a ellas. Si esta infección se detecta en el curso del tratamiento, debe interrumpirse para evitar la inducción de resistencias. En todos los pacientes debería realizarse un control del electrocardiográfico del QT antes de iniciar el tratamiento y, al menos, una vez al año (III-B).

- **Ibuprofeno.** Diferentes estudios<sup>164-166</sup> han mostrado que la administración de ibuprofeno a dosis elevadas consigue una mejoría radiológica y nutricional, una reducción del número de hospitalizaciones y una recuperación significativa del FEV<sub>1</sub>. Sin embargo, su uso está ligado a importantes efectos secundarios, aunque los beneficios podrían superar a las complicaciones<sup>166,167</sup>. No existen estudios que encuentren indicación en el tratamiento de la infección bronquial por *P. aeruginosa*. Según la Fundación Americana<sup>134</sup>, este tratamiento estaría indicado en niños mayores de 6 años con función pulmonar (FEV<sub>1</sub>>60%) y sin empleo de otros medicamentos nefrotóxicos<sup>165</sup> (I-C). En la actualidad no existen evidencias en los menores de 6 años<sup>134</sup>.

- **Corticoides sistémicos.** Los esteroides controlan la inflamación de las células bronquiales de los pacientes con FQ, a través de las vías NF-κB (factor nuclear potenciador de las cadenas ligeras kappa de las células B activadas) y MAPK

(proteínquinas activadas por mitógenos, *Mitogen-Activated Protein Kinases*) y de su interacción directa con AP-1 (proteína de activación 1, factor de transcripción que regula la expresión de genes) y NF-κB en el núcleo<sup>165</sup>. Diversos estudios demuestran que la prednisona (1-2 mg/Kg) en días alternos y a largo plazo (4 años), produce un enlentecimiento del daño pulmonar y una mejoría significativa de los valores espirométricos<sup>168</sup>, especialmente en niños con enfermedad pulmonar leve<sup>169</sup>. Sin embargo, esta mejoría es transitoria y los efectos adversos (diabetes, cataratas, retraso de la curva estatural, hiperglucemia...) significativos. Actualmente, sólo está probada una buena relación beneficio/riesgo en la aspergilosis pulmonar alérgica, broncoespasmo grave intratable, enfermedad grave de la pequeña vía aérea y enfermedad terminal, siendo preferible utilizar preparados sin recubrimiento entérico (I-C)<sup>134,157</sup>.

- **Corticoides inhalados.** A pesar de la generalización de su uso, ningún estudio prospectivo, randomizado, controlado con placebo, en pacientes con FQ mayores de 6 años, ha demostrado beneficio en la función pulmonar, reducción de exacerbaciones o cese de la corticoterapia sistémica en los que la precisaban, por lo que la última revisión Crochrane<sup>170</sup> y la Fundación Americana<sup>134</sup> desaconsejan su uso rutinario. Sin embargo, algunos trabajos encuentran un efecto antiinflamatorio directo sobre las células epiteliales bronquiales en la FQ, reduciendo la caída del FEV<sub>1</sub>, aunque con ciertos efectos secundarios<sup>171-173</sup>. No hay estudios que encuentren indicación en el tratamiento de la infección pulmonar por *P. aeruginosa*. La evidencia es insuficiente para establecer si los corticoides inhalados son beneficiosos en la FQ, por lo que este tratamiento sólo podría ser recomendado en pacientes con hiperreactividad bronquial documentada (I-C).



## **Medidas de control epidemiológico de *Pseudomonas aeruginosa***

La importancia del retrasar la adquisición de *P. aeruginosa* y evitar la infección bronquial crónica por este patógeno hace necesaria la adopción de medidas para prevenir la primoinfección e impedir la transmisión entre pacientes (III-A). En la mayoría de los casos se desconoce la fuente inicial de adquisición de *P. aeruginosa*, aunque hay numerosos reservorios ambientales que pueden facilitarla.

### **Reservorios**

*P. aeruginosa* se encuentra en ambientales naturales y domésticos, especialmente en lugares húmedos y calientes que contienen material orgánico o contaminado con residuos humanos o animales. No se encuentra en el mar, ya que las altas concentraciones de sal inhiben su crecimiento. Las piscinas son generalmente seguras por su cloración y en las duchas, no se han comunicado casos de infección cruzada; aunque se ha alertado del riesgo en piscinas de hidroterapia y en jacuzzis.

*P. aeruginosa* se encuentra frecuentemente en el ambiente hospitalario, sobre todo en las unidades de cuidados intensivos, pero con las medidas adecuadas no supone una fuente importante de infección. Los equipos contaminados pueden ser vehículos de infección cruzada. Los espirómetros no son un foco importante si se cumplen los estándares de higiene y limpieza. Asimismo, los nebulizadores de los pacientes infectados crónicamente por *P. aeruginosa* no son habitualmente portadores de *P. aeruginosa*<sup>174</sup>.

### **Transmisión**

Aunque se conoce que la transmisión de los patógenos en la FQ puede ocurrir por contacto directo o indirecto a través de fómites o gotas, su lugar de procedencia no está del todo aclarado. *P. aeruginosa* no mucóide puede sobrevivir en superficies inanimadas durante 24 h y las mucóides hasta 48 h, llegando a permanecer hasta 8 días

en el esputo sobre una superficie seca<sup>175</sup>.

Para evitar la transmisión por gotas, las guías de control de infección adaptadas a la FQ han defendido la regla de los 6 pies (aproximadamente 2 metros) como distancia mínima que evita la transmisión y plantean la necesidad de utilizar mascarillas<sup>19,176</sup>. Su uso rutinario ha sido recientemente recogido en las guías aunque es necesario más estudios para determinar la eficacia de su uso<sup>177</sup> (III-C).

La mayor parte de los pacientes con FQ mantiene un mismo clon durante toda su vida y se sospecha que, en la mayoría de los casos, la adquisición es ambiental. Por otro lado, hay evidencia de brotes de infección cruzada entre personas con FQ en campamentos, hospitales y reuniones. Por ello, se recomienda emplear medidas preventivas en esta población (III-A).

### **Recomendaciones generales**

La Fundación Americana de FQ, en su documento de control de infección<sup>158</sup> en FQ, recomienda cuatro normas básicas de prevención de la infección:

- Precauciones estándar. Todos los pacientes con FQ pueden presentar patógenos potencialmente transmisibles, por lo que debe extremarse la higiene de manos. No es necesario el empleo de mascarilla (salvo en los casos de colonización por cepas multirresistentes o hipertransmisibles en los que, dependiendo del grado de contacto, se aconsejará su uso y el de guantes y bata) (III-A).
- Prevención de la transmisión. Dado que la transmisión se puede producir por contacto, por vía aérea y a través del ambiente, se aconseja la segregación de pacientes con *P. aeruginosa* en las salas de espera y en consultas distintas, o su atención en días diferentes (III-A) y mantener una distancia mínima entre pacientes de 1-2 metros (III-A), aunque hay estudios que indican que las gotitas de las secreciones podrían llegar incluso a distancias de 3 metros<sup>178</sup>.

- Higiene de manos. Es la medida más importante en la prevención. Se debe promover activamente, disponer de dispensadores de soluciones alcohólicas e insistir en su cumplimiento (III-A). Se recomienda repetir la higiene de manos durante la visita, ya que con el lavado inicial, a veces no es suficiente<sup>179</sup>.
- Cuidado de equipos y materiales empleados. Se deben limpiar, desinfectar, enjuagar y secar siguiendo las instrucciones de cada fabricante (III-A). En general puede realizarse con diferentes procedimientos: agua hirviendo, esterilizador eléctrico o microondas (contraindicado en modelos con componentes metálicos), lavavajillas (>70°C 30 min), alcohol isopropílico al 70% 5 min, lejía (1 parte y 50 partes de agua) 30 min, o agua oxigenada al 3%, también durante 30 min. El aclarado se realizará con agua estéril (hervida). El último paso, también muy importante, es el secado completo al aire.

La espirometría debe de realizarse en salas bien ventiladas o utilizar espirómetros en la sala/habitación donde esté el paciente y con la puerta cerrada (III-A). En todos los casos, se debe seguir la política de control de infección para microorganismos multirresistentes de cada centro.

### **Recomendaciones específicas en el paciente en el seguimiento en la consulta externa, extrahospitalario y durante el ingreso en el hospital**

Las recomendaciones generales en el control de infección deben adaptarse a las peculiaridades de la FQ y a las medidas establecidas por los equipos de control de infección en cada centro (tabla 7)<sup>158,174</sup>. Entre estas medidas destacan:

- Cada unidad de FQ, con independencia de su tamaño, debe practicar una adecuada higiene en la consulta externa y en otras dependencias del hospital y tener una política de vigilancia y control de la infección que contemple las posibles infecciones cruzadas (III-A)

- El riesgo de infección cruzada entre pacientes es pequeño pero posible. Es apropiado separar a los pacientes crónicamente infectados de los que están libres de *P. aeruginosa* o, al menos, citar en horarios diferentes a los pacientes con cultivos intermitentes de *P. aeruginosa* y a los negativos e, incluso, a los portadores crónicos (III-B). La segregación de los pacientes será más necesaria cuando se identifiquen cepas multirresistentes o transmisibles de *P. aeruginosa* (III-A). Si se establece una política de segregación, debe aplicarse tanto en la consulta externa como en planta de hospitalización y en otras dependencias del centro sanitario.
- Es aconsejable monitorizar la frecuencia de nuevas adquisiciones de *P. aeruginosa* (cepas transmisibles) y la prevalencia de cepas multirresistentes (III-A).
- Desde el punto de vista microbiológico, se recomienda el genotipado de las cepas de *P. aeruginosa* para investigar posibles transmisiones cruzadas y fuentes de infección (III-C).

En los **pacientes con seguimiento en consulta externa** se deben también extremar las medidas estándar. Entre ellas resaltan:

- Lavado de manos, desinfección con alcohol o uso de guantes desechables, antes y después de la visita de cada paciente, y al principio y final de la consulta (III-A).
- Aconsejar a los pacientes que deben cubrir su boca y su nariz cuando tosan o estornuden, para evitar la dispersión de aerosoles (III-B).
- Los pacientes se deben lavar y desinfectar las manos antes de usar el espirómetro u otro instrumento que tengan que tocar (III-A).
- El estudio de la función pulmonar se debe realizar en habitaciones bien ventiladas y lejos de otros pacientes con FQ (III-B); también la recogida de las muestras respiratorias.
- Aplicar medidas de control para prevenir la contaminación y las infecciones

cruzadas a través del aparataje clínico, según el tipo de equipamiento (III-C). El aparataje personal (estetoscopio, esfigmomanómetro, etc) debe limpiarse entre paciente (III-A).

- Los frascos de recogida de esputo deben cerrarse adecuadamente. Nunca debe recogerse el esputo en los lavabos, inodoros o en la ducha (III-C). La fisioterapia respiratoria debe realizarse en una habitación individual, lejos de la sala de espera de los pacientes (III-B). Los fisioterapeutas deben utilizar batas desechables y aplicar normas de higiene adecuadas para prevenir la contaminación a través de sus manos (III-B).
- Se debe aconsejar a los pacientes que utilicen sus propios juguetes, libros, ordenadores, o consolas (III-C).

En el **paciente extrahospitalario** las medidas de prevención también deben evitar la adquisición y transmisión de *P. aeruginosa*:

- El paciente debe conocer su estado microbiológico de colonización y comentar los planes de prevención de la infección cruzada con su médico y enfermeras (III-C).
- Debe prohibirse la utilización de saunas, balnearios o baños con posibles nebulizaciones (III-B).
- En el colegio, siempre que sea posible, los pacientes con FQ no deben coincidir en la misma clase, o en actividades comunes entre ellos, aunque no hay evidencias de transmisión escolar de *P. aeruginosa* (III-C).
- Es recomendable que los servicios sanitarios educativos, el tutor/director de la escuela o los servicios médicos del trabajo, estén informados del estado microbiológico y los riesgos de infección cruzada con otros pacientes con FQ (III-C).
- Los hermanos con FQ deben tener habitaciones diferentes y realizar los

tratamientos nebulizados y la fisioterapia de forma separada (III-C).

- No se recomiendan reuniones, campamentos de vacaciones, o cualquier otra actividad comunitaria con otros pacientes FQ ( (III-B)<sup>174</sup>

En los **pacientes ingresados** se aplicarán las mismas medidas de prevención que en la consulta externa. Deben adaptarse a las peculiaridades de cada paciente:

- Debe haber dispensadores de líquido desinfectante de manos en la salida de cada habitación y utilizarse por todo el personal hospitalario y por los visitantes (III-A)
- Los pacientes deben estar en habitaciones individuales bien ventiladas, de adecuado tamaño y con baño en las mismas (III-A).
- Los equipamientos sanitarios no deben compartirse con otros pacientes (III-A) y deben limpiarse tras su uso, de acuerdo con las normas locales de control de infección (III-A)
- Los pacientes con diferentes microorganismos deben controlarse por un equipo diferente de enfermería (III-C).

Algunos estudios recientes abogan por la sustitución de las superficies de contacto de las consultas externas y zonas de hospitalización, por materiales de aleación de cobre. En algunos casos han demostrado su capacidad para reducir el riesgo de transmisión de los microorganismos, al disminuir la biocarga sobre su superficie<sup>180,181</sup>. No obstante, son necesarias más evidencias para recomendar su uso de forma universal (III-C).

## **Farmacoeconomía en el manejo de la infección por *P. aeruginosa* en fibrosis quística**

La FQ es una enfermedad asociada a un alto consumo de recursos sanitarios (tratamiento antibiótico frecuente, ingresos hospitalarios, necesidad de un seguimiento

estrecho, etc.) que explica que los costes que conlleva, médicos y no médicos, directos o indirectos (por ejemplo la incapacidad laboral que genera), sean elevados. Por este motivo, el aumento de la esperanza de vida de los pacientes con FQ se asocia a un incremento en el coste de la enfermedad<sup>182</sup>. En este contexto, el análisis económico de su diagnóstico y tratamiento adquiere una especial relevancia aunque puede vernir marcado por las diferencias en los precios de comercialización.

Hasta el momento se han realizado varios estudios, en Europa y EE UU, que abordan este problema, con especial énfasis en la infección por *P. aeruginosa*<sup>182-187</sup>. El coste anual de la enfermedad por paciente oscila entre 33.305\$, en EE UU<sup>182</sup> y 41.468€ en Alemania (valores de 2004)<sup>185</sup>. Estos datos son superponibles a los obtenidos en España cuyo gasto anual por caso, asciende a 37.343€<sup>187</sup>. En este coste promedio influyen diversos factores, especialmente la gravedad de la enfermedad y la infección crónica por *P. aeruginosa*. En el primer caso, la gravedad incide directamente en el coste anual, tanto en situación estable<sup>185</sup> como durante una hospitalización<sup>183</sup>. La infección por *P. aeruginosa*, ha demostrado incrementar un 55% el coste anual tras su primer aislamiento en el cultivo<sup>182</sup>. En este sentido, un estudio realizado en Italia demostró que el coste total de la erradicación temprana del patógeno era de 384.207€, con un coste medio por paciente y año de 1.259€<sup>184</sup>. Por otro lado, el coste total para el tratamiento antibiótico de los pacientes crónicos fue notablemente superior, ascendiendo a 2.303.852€. Otros estudios han establecido la relación entre el sexo y el coste del manejo de la enfermedad, estimando que estos son 1,22 veces más altos en la mujer que en el hombre<sup>186</sup>. Este mismo estudio estimó que la infección por *P. aeruginosa* incrementa los costes 1.41 veces.

Son varios los factores que contribuyen al incremento del coste que provoca la infección por *P. aeruginosa*. En EE UU, el ingreso hospitalario fue el factor que más

contribuyó al mismo (8.580\$), seguido de la atención en consulta externa (5.048\$) y de las prescripciones (4.834\$)<sup>182</sup>. En Alemania, el 94% del gasto se relacionó con el tiempo de atención al paciente por parte del equipo sanitario, los costes de medicamentos y de laboratorio, con una media de 38.869€. De éstos, los medicamentos tuvieron el mayor peso, con una media de 31.667€<sup>185</sup>. En España, la contribución más importante en los costes directos sanitarios (13.737€) corresponde a los medicamentos (45%, 6.117€), las consultas (19%, 2.651€), la hospitalización (17%, 2.342€) y las pruebas médicas (12%, 1.597€)<sup>185</sup>. De todo lo anterior se deduce que, si se quiere contener el gasto sanitario asociado a la FQ, los objetivos prioritarios de actuación deberían ser prevenir y evitar la infección crónica (actuar sobre la primoinfección), el gasto farmacéutico y las hospitalizaciones. Esto requeriría realizar estudios de farmacoeconomía que informasen del coste-eficacia, coste-beneficio y coste-utilidad de los tratamientos disponibles. En la tabla 8 se resumen los puntos clave en las intervenciones de coste-beneficio.

### **Perspectivas de futuro en el tratamiento de la infección bronquial por *Pseudomonas aeruginosa* en el paciente con fibrosis quística**

El tratamiento actual de la infección bronquial por *P. aeruginosa* se ha ido construyendo a lo largo de las últimas décadas a partir de la experiencia clínica y las evidencias científicas obtenidas con un número reducido de antimicrobianos y unos esquemas de tratamiento muy definidos. En un futuro cercano se dispondrá en España de nuevos antimicrobianos con esta indicación, como la colistina en polvo seco, y otros antibióticos inhalados en fase avanzada de desarrollo clínico con resultados prometedores como la amikacina liposomal, levofloxacino solución y ciprofloxacino en polvo seco. El hecho de disponer de antimicrobianos con diferentes perfiles de



actuación frente a *P. aeruginosa*, según se encuentre creciendo en *biofilm* o en forma planctónica, puede abrir nuevos esquemas de tratamiento al poder combinarlos de acuerdo a su mecanismo de acción. Asimismo, se dispondrá de las evidencias científicas suficientes para poder rotar o alternar los antibióticos inhalados en los periodos de descanso. Con ello se pretende disminuir el número de exacerbaciones y distanciarlas entre sí, reducir la caída de la función pulmonar y el uso de antibióticos orales durante los periodos de descanso en los esquemas de tratamiento *on-off* y limitar el desarrollo de resistencia. En la actualidad, se está investigando la posibilidad de simplificar los dispositivos de nebulización, la incorporación de sistemas de control para facilitar su uso correcto y la monitorización de la adherencia (en la actualidad es posible con algún tipo de nebulizador). También se debe profundizar en el manejo de los fármacos con actividad antiinflamatoria, su influencia en la infección y los biomarcadores más adecuados y en el diseño de estudios coste-beneficio que compare las diferentes alternativas terapéuticas. En un futuro, las nuevas terapias en FQ dirigidas a mejorar la funcionalidad de la proteína CFTR<sup>128,188</sup> pueden cambiar el paradigma de la utilización de los antimicrobianos en la infección bronquial por *P. aeruginosa* en FQ.

## Agradecimientos

Los trabajos de investigación de R. Cantón, A. Oliver, L. Martínez-Martínez en el área de la fibrosis quística y *Pseudomonas aeruginosa* están cofinanciados por el Instituto de Salud Carlos III (Ministerio de Economía y Competitividad) (ref. PI12/00734 y PI12/00103) y el European Development Regional Fund “A Way to Achieve Europe,” ERDF a través de la Red Española de Investigación en Patología Infecciosa (REIPI RD12/0015).

## Conflictos de intereses

R. Cantón ha participado en actividades de formación promovidas y financiadas por AstraZeneca, Gilead, Novartis y Praxis Pharmaceutical y desarrollados proyectos de investigación para Astra-Zeneca; L. Máiz ha participado en comités de expertos y actividades de formación promovidas y financiadas por Chiesi, Gilead, Novartis, Praxis y Vertex; A. Escribano ha participado en actividades de formación promovidas y financiadas por Chiesi, Novartis y Praxis y en comités de expertos con Gilead; C. Oliveira ha participado en comités de expertos y actividades de formación promovidas y financiadas por Gilead, Novartis, Praxis y Vertex; A. Oliver ha desarrollado proyectos de investigación financiados por Gilead; O. Asensio ha participado en actividades de formación promovidas y financiadas por Chiesi, Gilead, Novartis y Praxis y en comités de expertos y proyectos de investigación con GSK y Novartis; S. Gartner ha participado en actividades de formación promovidas y financiadas por Chiesi, Gilead, Novartis, Praxis y Vertex; E. Roma ha participado en actividades de formación promovidas y financiadas por Gilead, Novartis y Praxis; E. Quintana-Gallego ha participado en comités de expertos y actividades de formación promovidas y financiadas por Gilead, Novartis y Praxis; R. Girón ha participado en actividades de formación promovidas y financiadas por Chiesi, Gilead, Novartis y Praxis; M.I. Barrio ha participado en actividades de formación promovidas y financiadas por Chiesi, Gilead, Novartis, Praxis y Vertex; M.D. Pastor ha participado en actividades de formación promovidas y financiadas por Gilead; C. Prados ha participado en actividades de formación promovidas y financiadas por Gilead, Novartis y Praxis; J. Barberán ha participado en actividades de formación promovidas y financiadas por AstraZeneca y Gilead.; L. Martínez-Martínez ha participado en actividades de formación promovidas y financiadas y proyectos de investigación con Astra-Zeneca, GSK, Janssen-Cilag, MSD y Pfizer; C. Vázquez ha participado en actividades de formación promovidas y financiadas por Gilead, Novartis, Praxis y Vertex; J. de Gracia ha participado en comités de expertos y actividades de formación promovidas y financiadas por Chiesi, Gilead, Novartis, Praxis; A. Solé ha participado en actividades de formación promovidas y financiadas por Gilead, Novartis, Vertex y Praxis. A. Salcedo, M.T Martinez-Martinez, JJ Castón y JL. Luis Poveda, sin conflictos de interés.

## Referencias

1. Cantón R, Cobos N, de Gracia J, Baquero F, Honorato J, Gartner S, et al. Spanish Consensus Group for Antimicrobial Therapy in the Cystic Fibrosis Patient. Antimicrobial therapy for pulmonary pathogenic colonisation and infection by *Pseudomonas aeruginosa* in cystic fibrosis patients. Clin Microbiol Infect. 2005;11:690-703.
2. UK Cystic Fibrosis Trust. Antibiotic treatment for cystic fibrosis. Report of the UK Cystic Fibrosis Trust Antibiotic Working Group, 2009. [https://www.cysticfibrosis.org.uk/media/82010/CD\\_Antibiotic\\_treatment\\_for\\_CF\\_May\\_09.pdf](https://www.cysticfibrosis.org.uk/media/82010/CD_Antibiotic_treatment_for_CF_May_09.pdf)
3. Döring G, Flume P, Heijerman H, Elborn JS; for the Consensus Study Group. Treatment of lung infection in patients with cystic fibrosis: Current and future strategies. J Cyst Fibros. 2012;11:461-79.
4. Flume PA, Mogayzel PJ Jr, Robinson KA, Goss CH, Rosenblatt RL, Kuhn RJ, et al. Clinical Practice Guidelines for Pulmonary Therapies Committee. Cystic fibrosis pulmonary guidelines: treatment of pulmonary exacerbations. Am J Respir Crit Care Med. 2009;180:802-8.
5. Barrio Gómez de Agüero MI, García Hernández G, Gartner S. y Grupo de Trabajo de Fibrosis Quística. Protocolo de diagnóstico y seguimiento de los pacientes con fibrosis quística. Ann Pediatr 2009;71:250-64.
6. Mogayzel PJ Jr, Naureckas ET, Robinson KA, Mueller G, Hadjiladis D, Hoag JB, et al. Pulmonary Clinical Practice Guidelines Committee. Cystic fibrosis pulmonary guidelines. Chronic medications for maintenance of lung health. Am J Respir Crit Care Med. 2013;187:680-9.
7. Ryan G, Singh M, Dwan K. Inhaled antibiotics for long-term therapy in cystic fibrosis. Cochrane Database Syst Rev 2011; Mar 16; 3:CD001021.
8. Hauser AR, Jain M, Bar-Meir M, McColley SA. Clinical significance of microbial infection and adaptation in cystic fibrosis. Clin Microbiol Rev 2011; 24:29-70.
9. Ciofu O, Hansen CR, Høiby N. Respiratory bacterial infections in cystic fibrosis. Curr Opin Pulm Med. 2013; 19:251-8.
10. Folkesson A, Jelsbak L, Yang L, Johansen HK, Ciofu O, Høiby N, et al. Adaptation of *Pseudomonas aeruginosa* to the cystic fibrosis airway: an evolutionary perspective. Nat Rev Microbiol. 2012; 10:841-51.
11. Burns JL, Rolain JM. Culture-based diagnostic microbiology in cystic fibrosis: Can we simplify the complexity? J Cyst Fibros 2014; 13:1-9.
12. Oliver A, Alarcón T, Caballero E, Cantón R. Diagnóstico Microbiológico de la colonización-infección broncopulmonar en el paciente con fibrosis quística. Enferm Infecc Microbiol Clin 2009; 27: 89-04.
13. Plosker GL. Aztreonam lysine for inhalation solution: in cystic fibrosis. Drugs 2010; 70:1843-55.
14. Máiz L, Girón RM, Oliveira C, Quintana E, Lamas A, Pastor D, et al. Inhaled antibiotics for the treatment of chronic bronchopulmonary *Pseudomonas aeruginosa* infection in cystic fibrosis: systematic review of randomized controlled trials. Expert Opin Pharmacother. 2013;14: 1135-49.
15. Prescott WA, Nagel JL. Extended-interval once-daily dosing of aminoglycosides in adult and pediatric patients with cystic fibrosis. Pharmacotherapy 2010; 30:95-108.

16. Stockmann C, Sherwin CM, Zobell JT, Young DC, Waters CD, Spigarelli MG, et al. Optimization of anti-pseudomonal antibiotics for cystic fibrosis pulmonary exacerbations: III. fluoroquinolones. *Pediatr Pulmonol.* 2013; 48:211-20.
17. Young DC, Zobell JT, Waters CD, Ampofo K, Stockmann C, Sherwin CM, et al. Optimization of anti-pseudomonal antibiotics for cystic fibrosis pulmonary exacerbations: IV. colistimethate sodium. *Pediatr Pulmonol.* 2013; 48:1-7.
18. Gartner S, Cobos N. Cribado neonatal para la fibrosis quística. *An Pediatr (Barc).* 2009; 71:481-2.
19. Saiman L. Infection prevention and control in cystic fibrosis. *Current Opin Infect Dis.* 2011; 24:390-5.
20. Gross PA, Barrett TL, Dellinger P, Krause PJ, Martone WJ, McGowan Jr JE, et al. Purpose of quality standards for Infectious Diseases. Infectious Diseases Society of America. *Clin Infect Dis* 1994; 18:421.
21. Troxler RB, Hoover WC, Britton LJ, Gerwin AM, Rowe SM. Clearance of initial mucoid *Pseudomonas aeruginosa* in patients with CF. *Pediatr Pulmonol.* 2012;47:1113-22
22. Lee TWR, Brownlee KG, Conway SP, Denton M, Littlewood JM. Evaluation of a new definition for chronic *Pseudomonas aeruginosa* infection in cystic fibrosis patients. *J Cystic Fibros.* 2003;2:29-34
23. Rosenfeld M, Emerson J, McNamara S, Joubran K, Retsch-Bogart G, Graff GR, et al. EPIC Study Group Participating Clinical Sites. Baseline characteristics and factors associated with nutritional and pulmonary status at enrollment in the cystic fibrosis EPIC observational cohort. *Pediatr Pulmonol.* 2010;45:934-44.
24. Gartner S, Casals T, Marin JL, Seculi JL, Asensio O, Lopez JL, et al. Neonatal cystic fibrosis screening (1999-2009) in Catalonia, Spain. *Pediatr Pulmunol.* 2011;46:S371.
25. Dalboge CS, Pressler T, Hoiby N, Nielsen JG, Krogh Johansen H. A cohort study of the Copenhagen CF-Centre eradication strategy against *Staphylococcus aureus*. *J Cyst Fibros.* 2013;12:42-48
26. Sly PD, Gangell CL, Chen L, Ware RS, Ranganathan S, Mott LS, Murray CP, Stick SM; AREST CF Investigators. Risk factors for bronchiectasis in children with cystic fibrosis. *N Engl J Med.* 2013; 368:1963-70.
27. Stafler P, Davies JC, Balfour-Lynn IM, Rosenthal M, Bush A. Bronchoscopy in cystic fibrosis infants diagnosed by newborn screening. *Pediatr Pulmonol.* 2011;46:696-0.
28. Ratjen F, Walter H, Haug M, Meisner C, Grasse mann H, Döring G. Diagnostic value of serum antibodies in early *Pseudomonas aeruginosa* infection in cystic fibrosis patients. *Pediatr Pulmonol.* 2007;42:249-55.
29. Anstead M, Heltshe SL, Khan U, Barbieri JT, Langkamp M, Döring G, et al. *Pseudomonas aeruginosa* serology and risk for re-isolation in the EPIC trial. *J Cyst Fibros.* 2012 Aug 31. (Epub ahead of print).
30. Deschagh P, Van Daele S, De Baets F, Vaneechoutte M. PCR and the detection of *Pseudomonas aeruginosa* in respiratory samples of CF patients. A literature review. *J Cyst Fibros.* 2011;10:293-7.

31. Goeminne PC, Vandendriessche T, Van Eldere J, Nicolai BM, Hertog ML, Dupont LJ. Detection of *Pseudomonas aeruginosa* in sputum headspace through volatile organic compound analysis. *Respir Res.* 2012; 13:87.
32. Cystic Fibrosis Foundation. Cystic Fibrosis Foundation Patient registry 2011 Annual Data report. Bethesda, MD: Cystic Fibrosis Foundation. 2013
33. ECFS patient Registry. Annual Data Report 2008-9, European Cystic Fibrosis Society 2012.
34. McKay KO, Cooper PJ, van Asperen PP. Segregation of children with CF diagnosed via newborn screening and acquisition of *Pseudomonas aeruginosa*. *J Cyst Fibros.* 2009; 8:400-4.
35. Emerson J, Rosenfeld M, McNamara S, Ramsey B, Gibson RL. *Pseudomonas aeruginosa* and other predictors of mortality and morbidity in young children with cystic fibrosis. *Pediatr Pulmonol.* 2002;34:91-100.
36. Ren CL, Rosenfeld M, Mayer OH, Davis SD, Kloster M, Castile RG, et al. Analysis of the associations between lung function and clinical features in preschool children with cystic fibrosis. *Pediatr Pulmonol.* 2012;47:574-81.
37. Taylor-Robinson D, Whitehead M, Diderichsen F, Olesen HV, Pressler T, Smyth RL, et al. Understanding the natural progression in %FEV1 decline in patients with cystic fibrosis: a longitudinal study. *Thorax.* 2013;68:294-5.
38. Vendrell M, de Gracia J, Oliveira C, Martínez MA, Girón R, Máiz L, et al. Diagnosis and treatment of bronchiectasis. *Arch Bronconeumol.* 2008;44:629-40.
39. Li Z, Kosorok MR, Farrell PM, Laxova A, West SE, Green CG, et al. Longitudinal development of mucoid *Pseudomonas aeruginosa* infection and lung disease progression in children with cystic fibrosis. *JAMA.* 2005;293:581-8
40. Ferkol T, Rosenfeld M, Milla CE. Cystic fibrosis pulmonary exacerbations. *J Pediatr.* 2006;148:259-64.
41. Regelman WE, Schechter MS, Wagener JS, Morgan WJ, Pasta DJ, Elkin EP, et al. Pulmonary exacerbations in cystic fibrosis: young children with characteristic signs and symptoms. *Pediatr Pulmonol.* 2013;48:649-57.
42. Sagel SD, Wagner BD, Anthony MM, Emmett P, Zemanick ET. Sputum biomarkers of inflammation and lung function decline in children with cystic fibrosis. *Am J Respir Crit Care Med.* 2012;186:857-65.
43. Ordoñez CL, Henig NR, Mayer-Hamblett N, Accurso FJ, Burns JL, Chmiel JF, et al. Inflammatory and microbiologic markers in induced sputum after intravenous antibiotic in cystic fibrosis. *Am J Respir Crit Care Med.* 2003;168:1471-5.
44. Antuni JD, Kharitonov SA, Hughes D, Hodson ME, Barnes PJ. Increase in exhaled carbon monoxide during exacerbations of cystic fibrosis. *Thorax.* 2000;55:138-42.
45. Belessis Y, Dixon B, Hawkins G, Pereira J, Peat J, MacDonald R, et al. Early cystic fibrosis lung disease detected by bronchoalveolar lavage and lung clearance index. *Am J Respir Crit Care Med.* 2012;185:862-73.
46. Aurora P. Multiple-breath inert gas washout test and early cystic fibrosis lung disease. *Thorax.* 2010;65:373-4

47. Owens CM, Aurora P, Stanojevic S, Bush A, Wade A, Oliver C, et al. Lung Clearance Index and HRCT are complementary markers of lung abnormalities in young children with CF. *Thorax*. 2011;66:481-8.
48. Taccetti G, Campana S, Festini F, Mascherini M, Döring G. Early eradication therapy against *Pseudomonas aeruginosa* in cystic fibrosis patients. *Eur Respir J*. 2005;26:1-4.
49. Bell SC, Morris NR. Exercise testing in patients with cystic fibrosis: Why and which? *J Cyst Fibros*. 2010;9:299-301.
50. Linnane B, Robinson P, Ranganathan S, Stick S, Murray C. Role of high-resolution computed tomography in the detection of early CF lung disease. *Paediatr Respir Rev*. 2008;9:168-74.
51. Mott LS, Park J, Murray CP, Gangell CL, de Klerk NH, Robinson PJ, et al. Progression of early structural lung disease in young children with cystic fibrosis assessed using computed tomography. *Thorax*. 2012;67:509-16.
52. Robinson TE, Leung AN, Chen X, Moss RB, Emond MJ. Cystic fibrosis HRCT scores correlate strongly with *Pseudomonas* infection. *Pediatr Pulmonol*. 2009;44:1107-17.
53. Folescu TW, Marques Ede A, Boechat MC, Daltro P, Higa LY, Cohen RW. High-resolution computed tomography scores in cystic fibrosis patients colonized with *Pseudomonas aeruginosa* or *Staphylococcus aureus*. *J Bras Pneumol*. 2012;38:41-9.
54. Loeve M, Gerbrands K, Hop WC, Rosenfeld M, Hartmann IC, Tiddens HA. Bronchiectasis and pulmonary exacerbations in children and young adults with cystic fibrosis. *CHEST*. 2011;140:178-85.
55. Young C, Owens C. To CT or not to CT? That is the question': outcome surrogates for surveillance in childhood cystic fibrosis. *Thorax*. 2012;67:471-2.
56. Tiddens HA, de Jong PA. Update on the application of chest computed tomography scanning to cystic fibrosis. *Curr Opin Pulm Med*. 2006;12:433-3.
57. De Jong PA, Tiddens HA, Lequin MH, Robinson TE, Brody AS. Estimation of the radiation dose from CT in cystic fibrosis. *Chest*. 2008;133:1289-91.
58. Puderbach M, Eichinger M. The role of advanced imaging techniques in cystic fibrosis follow-up: is there a place for MRI?. *Pediatr Radiol*. 2010;40:844-9.
59. Guilligan PH, Kiska DL, Appleman MD. Cystic Fibrosis Microbiology. Cumitech 43. ASM Press. Washington DC. 2006.
60. UK Cystic Fibrosis Trust. Laboratory standards for processing microbiological samples from people with cystic fibrosis. Report of the UK cystic fibrosis microbiology standards working group. First Edition. 2010. [https://www.cysticfibrosis.org.uk/media/82034/CD\\_Laboratory\\_Standards\\_Sep\\_10.pdf](https://www.cysticfibrosis.org.uk/media/82034/CD_Laboratory_Standards_Sep_10.pdf)
61. Kerem E, Conway S, Elborn S, Heijerman H for the Consensus Committee. Standards of clinical care for patients with Cystic fibrosis. An European Consensus. *J Cyst Fibros*. 2005;4:7-26.
62. Pressler T, Frederiksen B, Skov M, Garred P, Koch C, Hoiby N. Early rise of anti-*Pseudomonas* antibodies and a mucoid phenotype of *Pseudomonas aeruginosa* are risk factors for the development of chronic lung infection. A case control study. *J Cyst Fibros*. 2006;5:9-15

63. European Medicines Agency. Report of the workshop on endpoints for cystic fibrosis clinical trials, London, 27-28 September 2012. [http://www.ema.europa.eu/docs/en\\_GB/document\\_library/Report/2012/12/WC500136159.pdf](http://www.ema.europa.eu/docs/en_GB/document_library/Report/2012/12/WC500136159.pdf)
64. Schelstraete P, Haerynck F, Van daele S, Deseyne S, De Baets F. Eradication therapy for *Pseudomonas aeruginosa* colonization episodes in cystic fibrosis patients not chronically colonized by *P. aeruginosa*. J Cyst Fibros. 2013;12:1-8.
65. Aanaes K. Bacterial sinusitis as a focus for initial lung colonisation and chronic lung infection in patients with Cystic fibrosis. J Cyst Fibros. 2013;12:1-20.
66. McPherson H, Rosenthal M, Bush A. Can mucoid *Pseudomonas aeruginosa* be eradicated in children with Cystic fibrosis?. Pediatr Pulmonology. 2010;45:506-508.
67. Proesmans M, Balinska-Miskiewicz W, Dupont L, Bossuyt X, Verhaegen J, Hoiby N, et al. Evaluating the "Leeds criteria" for *Pseudomonas aeruginosa* infection in a cystic fibrosis centre. Eur Respir J. 2006;27: 937-43.
68. Lister PD, Wolter DJ, Hanson ND. Antibacterial-resistant *Pseudomonas aeruginosa*: clinical impact and complex regulation of chromosomally encoded resistance mechanisms. Clin Microbiol Rev. 2009;22:582-610
69. Vettoretti L, Plésiat P, Muller C, El Garch F, Phan G, Attrée I, et al. Efflux unbalance in *Pseudomonas aeruginosa* Isolates from cystic fibrosis patients. Antimicrob Agents Chemother. 2009;53:1987-97.
70. Qin X, Zerr DM, McNutt MA, Berry JE, Burns JL, Kapur RP. *Pseudomonas aeruginosa* syntrophy in chronically colonized airways of cystic fibrosis patients. Antimicrob Agents Chemother. 2012;56:5971-81
71. Oliver A, Mena A. Bacterial hypermutation in cystic fibrosis, not only for antibiotic resistance. Clin Microbiol Infect. 2010;16:798-808.
72. Oliver A. Mutators in cystic fibrosis chronic lung infection: Prevalence, mechanisms, and consequences for antimicrobial therapy. Int J Med Microbiol. 2010;300:563-72
73. Høiby N, Bjarnsholt T, Givskov M, Molin S, Ciofu O. Antibiotic resistance of bacterial biofilms. Int J Antimicrob Agents. 2010;35:322-32.
74. Mulet X, Maciá MD, Mena A, Juan C, Pérez JL, Oliver A. Azithromycin in *Pseudomonas aeruginosa* biofilms: bactericidal activity and selection of nfxB mutants. Antimicrob Agents Chemother. 2009;53:1552-60.
75. Mulet X, Moyá B, Juan C, Maciá MD, Pérez JL, Blázquez J, et al. Antagonistic interactions of *Pseudomonas aeruginosa* antibiotic resistance mechanisms in planktonic but not biofilm growth. Antimicrob Agents Chemother. 2011;55:4560-8.
76. Rodríguez-Rojas A, Oliver A, Blázquez J. Intrinsic and environmental mutagenesis drive diversification and persistence of *Pseudomonas aeruginosa* in chronic lung infections. J Infect Dis. 2012;205:121-7.
77. Luján AM, Maciá MD, Yang L, Molin S, Oliver A, Smania AM. Evolution and adaptation in *Pseudomonas aeruginosa* biofilms driven by mismatch repair system-deficient mutators. PLoS One. 2011;6:e27842.

78. Jones AM, Dodd ME, Morris J, Doherty C, Govan JR, Webb AK. Clinical outcome for cystic fibrosis patients infected with transmissible *Pseudomonas aeruginosa*: an 8-year prospective study. *Chest*. 2010;137:1405-9
79. Cheng K, Smyth RL, Govan JRW, Doherty C, Winstanley C, et al. (1996) Spread of beta-lactam-resistant *Pseudomonas aeruginosa* in a cystic fibrosis clinic. *Lancet* 1996; 348: 639–42.
80. López-Causapé C, Rojo-Molinero E, Mulet X, Cabot G, Moyà B, Figuerola J, et al. Clonal dissemination, emergence of mutator lineages, and antibiotic resistance evolution in cystic fibrosis chronic lung infection. *PLoS One*. 2013;8:e71001.
81. Fernández-Olmos A, García-Castillo M, Alba JM, Morosini MI, Lamas A, Romero B, et al. Population structure and antimicrobial susceptibility of both nonpersistent and persistent *Pseudomonas aeruginosa* isolates recovered from cystic fibrosis patients. *J Clin Microbiol*. 2013;51:2761-5.
82. Juan C, Gutiérrez O, Renom F, Garau M, Gallegos C, Albertí S, et al. Chronic respiratory infections by mucoid carbapenemase-producing *Pseudomonas aeruginosa* strains, a new potential public health problem. *Antimicrob Agents Chemother*. 2008;52:2285-6.
83. Burns JL, Saiman L, Whittier S, Larone D, Krzewinski J, Liu Z, et al. Comparison of agar diffusion methodologies for antimicrobial susceptibility testing of *Pseudomonas aeruginosa* isolates from cystic fibrosis patients. *J Clin Microbiol*. 2000;38:1818-22
84. Maciá MD, Borrell N, Pérez JL, Oliver A. Detection and susceptibility testing of hypermutable *Pseudomonas aeruginosa* strains with the Etest and disk diffusion. *Antimicrob Agents Chemother*. 2004;48:2665-72.
85. Burns JL, Saiman L, Whittier S, Krzewinski J, Liu Z, Larone D, et al. *Diagn Microbiol. Infect Dis*. 2001;39:257-60
86. Morlin GL, Hedges DL, Smith AL, Burns JL. Accuracy and cost of antibiotic susceptibility testing of mixed morphotypes of *Pseudomonas aeruginosa*. *J Clin Microbiol*. 1994;32:1027-30.
87. Smith AL, Fiel SB, Mayer-hamblett N, Ramsey B, Burns JL. Susceptibility testing of *P. aeruginosa* isolates and clinical response to parenteral antibiotic administration: lack of correlation in cystic fibrosis. *Chest*. 2003;123:1495-502.
88. Foweraker JE, Laughton CR, Brown DF, Bilton D. Phenotypic variability of *Pseudomonas aeruginosa* in sputa from patients with acute infective exacerbation of cystic fibrosis and its impact on the validity of antimicrobial susceptibility testing. *J Antimicrob Chemother*. 2005;55:921-7.
89. Hogardt M, Ulrich J, Riehn-Kopp H, Tümmler B. EuroCareCF quality assessment of diagnostic microbiology of cystic fibrosis isolates. *J Clin Microbiol*. 2009;47:3435-8.
90. Zebouh M, Thomas C, Honderlick P, Lemee L, Segonds C, Wallet F, et al. Direct antimicrobial susceptibility testing method for analysis of sputum collected from patients with cystic fibrosis. *J Cystic Fibrosis*. 2008;7:238-43.
91. Aaron SD, Vandemheen KL, Ferris W, Fergusson D, Tullis E, Haase D, et al. Combination antibiotic susceptibility testing to treat exacerbations of cystic fibrosis associated with



- multiresistant bacteria: a randomised, double-blind, controlled clinical trial. *Lancet*. 2005;366:463-71
92. Morosini MI, García-Castillo M, Loza E, Pérez-Vázquez M, Baquero F, Cantón R. Breakpoints for predicting *Pseudomonas aeruginosa* susceptibility to inhaled tobramycin in cystic fibrosis patients: use of high-range Etest strips. *J Clin Microbiol*. 2005;43:4480-5.
93. Hill D, Rose B, Pajkos A, Robinson M, Bye P, Bell S, et al. Antibiotic susceptibilities of *Pseudomonas aeruginosa* isolates derived from patients with cystic fibrosis under aerobic, anaerobic, and biofilm conditions. *J Clin Microbiol*. 2005;43:5085-90
94. Moskowitz SM, Foster JM, Emerson JC, Gibson RL, Burns JL. Use of *Pseudomonas* biofilm susceptibilities to assign simulated antibiotic regimens for cystic fibrosis airway infection. *J Antimicrob Chemother*. 2005;56:879-86.
95. Moskowitz SM, Emerson JC, McNamara S, Shell RD, Orenstein DM, Rosenbluth D, et al. Randomized trial of biofilm testing to select antibiotics for cystic fibrosis airway infection. *Pediatr Pulmonol*. 2011;46:184-92.
96. Langton Hower SC, Smyth AR. Antibiotic strategies for eradicating *Pseudomonas aeruginosa* in people with cystic fibrosis. *Cochrane Database Syst Rev*. 2009;(4):CD004197.
97. Littlewood KJ, Higashi K, Jansen JP, Capkun-Niggli G, Balp MM, Doering G, et al. A network meta-analysis of the efficacy of inhaled antibiotics for chronic *Pseudomonas* infections in cystic fibrosis. *J Cyst Fibros*. 2012;11:419-26.
98. Ramsey BW, Pepe MS, Quan JM, Otto KL, Montgomery AB, Williams-Warren J, et al. Intermittent administration of inhaled tobramycin in patients with cystic fibrosis. Cystic Fibrosis Inhaled Tobramycin Study Group. *N Engl J Med*. 1999;340:23-30.
99. McCoy KS, Quittner AL, Oermann CM, Gibson RL, Retsch-Bogart GZ, Montgomery AB. Inhaled aztreonam lysine for chronic airway *Pseudomonas aeruginosa* in cystic fibrosis. *Am J Respir Crit Care Med*. 2008;178:921-8.
100. Touw DJ, Vinks AA, Mouton JW, Horrevorts AM. Pharmacokinetic optimisation of antibacterial treatment in patients with cystic fibrosis. Current practice and suggestions for future directions. *Clin Pharmacokinet*. 1998;35:437-59
101. Zobel JT, Young DC, Waters CD, Stockmann C, Ampofo K, Sherwin CM, et al. Optimization of anti-pseudomonal antibiotics for cystic fibrosis pulmonary exacerbations: I. aztreonam and carbapenems. *Pediatr Pulmonol*. 2012;47:1147-58.
102. Zobel JT, Young DC, Waters CD, Ampofo K, Stockmann C, Sherwin CM, et al. Optimization of anti-pseudomonal antibiotics for cystic fibrosis pulmonary exacerbations: VI. Executive summary. *Pediatr Pulmonol*. 2013;48:525-37.
103. Touw DJ. Clinical pharmacokinetics of antimicrobial drugs in cystic fibrosis. *Pharm World Sci*. 1998;20:149-60.
104. Rey E, Treluyer JM, Pons G. Drug disposition in cystic fibrosis. *Clin Pharmacokinet*. 1998;35:313-29

105. Young DC, Zobell JT, Stockmann C, Waters CD, Ampofo K, Sherwin CM, et al. Optimization of anti-pseudomonal antibiotics for cystic fibrosis pulmonary exacerbations: V. Aminoglycosides. *Pediatr Pulmonol*. 2013;48:1047-61.
106. Butterfield JM, Lodise TP, Beegle S, Rosen J, Farkas J, Pai MP. Pharmacokinetics and pharmacodynamics of once-daily administration of intravenous tobramycin in adult patients with cystic fibrosis hospitalized for an acute pulmonary exacerbation. *Antimicrob Agents Chemother*. 2013;57:5175-7.
107. Geller DE, Pitlick WH, Nardella PA, Tracewell WG, Ramsey BW. Pharmacokinetics and bioavailability of aerosolized tobramycin in cystic fibrosis. *Chest*. 2002;122:219-26.
108. Macià MD, Pérez JL, Molin S, Oliver A. Dynamics of mutator and antibiotic-resistant populations in a pharmacokinetic/pharmacodynamic model of *Pseudomonas aeruginosa* biofilm treatment. *Antimicrob Agents Chemother*. 2011;55:5230-7.
109. Manduru M, Mihm LB, White RL, Friedrich LV, Flume PA, Bosso JA. *In vitro* pharmacodynamics of ceftazidime against *Pseudomonas aeruginosa* isolates from cystic fibrosis patients. *Antimicrob Agents Chemother*. 1997;41:2053-6.
110. Ratjen F, Rietschel E, Kasel D, Schwiertz R, Starke K, Beier H, et al. Pharmacokinetics of inhaled colistin in patients with cystic fibrosis. *J Antimicrob Chemother*. 2006;57:306-11.
111. Li J, Coulthard K, Milne R, Nation RL, Conway S, Peckham D, et al. Steady-state pharmacokinetics of intravenous colistin methanesulphonate in patients with cystic fibrosis. *J Antimicrob Chemother*. 2003;52:987-92.
112. Dudhani RV, Turnidge JD, Coulthard K, Milne RW, Rayner CR, Li J, et al. Elucidation of the pharmacokinetic/pharmacodynamic determinant of colistin activity against *Pseudomonas aeruginosa* in murine thigh and lung infection models. *Antimicrob Agents Chemother*. 2010;54:1117-24.
113. Schuster A, Haliburn C, Döring G, Goldman MH; for the Freedom Study Group. Safety, efficacy and convenience of colistimethate sodium dry powder for inhalation (Colobreathe DPI) in patients with cystic fibrosis: a randomised study. *Thorax*. 2013;68:344-50.
114. Tramper-Stranders GA, Wolfs TF, van Haren Noman S, van Aalderen WM, Nagelkerke AF, Nuijsink M, et al. Controlled trial of cycled antibiotic prophylaxis to prevent initial *Pseudomonas aeruginosa* infection in children with cystic fibrosis. *Thorax*. 2010;65:915-20.
115. McKay KO, Cooper PJ, van Asperen PP. Segregation of children with CF diagnosed via newborn screening and acquisition of *Pseudomonas aeruginosa*. *J Cyst Fibros*. 2009;8:400-4.
116. Griffiths AL, Wurzel DF, Robinson PJ, Carzino R, Massie J. Australian epidemic strain *pseudomonas* (AES-1) declines further in a cohort segregated cystic fibrosis clinic. *J Cyst Fibros*. 2012;11:49-52.
117. Johansen HK, Gøtzsche PC. Vaccines for preventing infection with *Pseudomonas aeruginosa* in cystic fibrosis. *Cochrane Database Syst Rev*. 2013; Jun 17; 6:CD001399.
118. Vázquez C, Elorz J, Baranda F, Sojo A, Pijoan JI. Early treatment of bronchial colonization with *Pseudomonas aeruginosa* in Cystic fibrosis. Twelve-year experience. *J Cyst Fibros*. 2002;1(S1):51.

119. Vázquez C, Municio M, Corera M, Gaztelurrutia L, Sojo A, Vitoria JC. Early treatment of *Pseudomonas aeruginosa* colonization in cystic fibrosis. *Acta Paediatr* 1993; 82 :308-309.
120. Wiesemann HG, Steinkamp G, Ratjen F, Bauernfeind A, Przyklenk B, Döring G, et al. Placebo-controlled, double-blind, randomized study of aerosolized tobramycin for early treatment of *Pseudomonas aeruginosa* colonization in cystic fibrosis. *Pediatr Pulmonol*. 1998;25:88-92.
121. Gibson RL, Emerson J, McNamara S, Burns JL, Rosenfeld M, Yunker A, et al. Significant microbiological effect of inhaled tobramycin in young children with cystic fibrosis. *Am J Respir Crit Care Med*. 2003;167:841-9.
122. Taccetti G, Bianchini E, Cariani L, Buzzetti R, Costantini D, Trevisan F, et al. Early antibiotic treatment for *Pseudomonas aeruginosa* eradication in patients with cystic fibrosis: a randomised multicentre study comparing two different protocols. *Thorax*. 2012;67:853-9.
123. Ratjen F, Munck A, Kho P, Angyalosi G; ELITE Study Group. Treatment of early *Pseudomonas aeruginosa* infection in patients with cystic fibrosis: the ELITE trial. *Thorax*. 2010;65:286-91.
124. Stick S, Tiddens H, Aurora P, Gustafsson P, Ranganathan S, Robinson P, et al. Early intervention studies in infants and preschool children with cystic fibrosis: are we ready?. *Eur Respir J*. 2013;42:527-38.
125. Frederiksen B, Koch C, Hoiby N. Antibiotic treatment of initial colonization with *Pseudomonas aeruginosa* postpones chronic infection and prevents deterioration of pulmonary function in cystic fibrosis. *Ped Pulmonol*. 1997;23:330-5.
126. Hansen CR, Pressler T, Høiby N. Early aggressive eradication therapy for intermittent *Pseudomonas aeruginosa* airway colonization in cystic fibrosis patients: 15 years experience. *J Cyst Fibros*. 2008;7:523-30.
127. Treggiari MM, Retsch-Bogart G, Mayer-Hamblett N, Khan U, Kulich M, et al. Comparative efficacy and safety of 4 randomized regimens to treat early *Pseudomonas aeruginosa* infection in children with cystic fibrosis. *Arch Pediatr Adolesc Med*. 2011;165:847-56.
128. Gibson RL, Emerson J, Mayer-Hamblett N, Burns JL, McNamara S, et al. Duration of treatment effect after tobramycin solution for inhalation in young children with cystic fibrosis. *Pediatr Pulmonol*. 2007;42:610-23.
129. Tiddens HAW, De Boeck K, Clancy JP, Fayon M, Arets HGM, Bresnik M, Derchak A, Lewis SA, Oermann CM for the ALPINE study investigators. Open-label study of inhaled aztreonam for *Pseudomonas* eradication in children with cystic fibrosis: the ALPINE study. *J Cystic Fibrosis* 2014; August 1 [Epub ahead of print]
130. Fauvart M, De Groote VN, Michiels J. Role of persister cells in chronic infections: clinical relevance and perspectives on anti-persister therapies. *J Med Microbiol* 2011; 60(Pt 6):699-709.
131. Levy H, Kalish LA, Cannon CL, García KC, Gerard C, Goldmann D, et al. Predictors of mucoid *Pseudomonas* colonization in cystic fibrosis patients. *Pediatr Pulmonol*. 2008;43:463-71.
132. Tramper-Stranders GA, van der Ent CK, Molin S, Yang L, Hansen SK, Rau MH, et al. Initial *Pseudomonas aeruginosa* infection in patients with cystic fibrosis: characteristics of eradicated and persistent isolates. *Clin Microbiol Infect*. 2012;18:567-74.

133. Proesmans M, Vermeulen F, Boulanger L, Verhaegen J, De Boeck K. Comparison of two treatment regimens for eradication of *Pseudomonas aeruginosa* infection in children with cystic fibrosis. *J Cyst Fibros*. 2013;12:29-34.
134. Flume PA, O'Sullivan BP, Robinson KA, Goss CH, Mogayzel PJ Jr, Willey-Courand DB, et al. Cystic fibrosis pulmonary guidelines: chronic medications for maintenance of lung health. *Am J Respir Crit Care Med*. 2007;176:957-69.
135. Heijerman H, Westerman E, Conway S, Touw D, Döring G; consensus working group. Inhaled medication and inhalation devices for lung disease in patients with cystic fibrosis: A European consensus. *J Cyst Fibros*. 2009;8:295-315.
136. Jensen T, Pedersen SS, Garne S, Heilmann C, Høiby N, Koch C. Colistin inhalation therapy in cystic fibrosis patients with chronic *Pseudomonas aeruginosa* lung infection. *J Antimicrob Chemother*. 1987;19:831-8.
137. Hodson ME, Gallagher CG, Govan JR. A randomised clinical trial of nebulised tobramycin or colistin in cystic fibrosis. *Eur Respir J*. 2002;20:658-64.
138. Murphy TD, Anbar RD, Lester LA, Nasr SZ, Nickerson B, VanDevanter DR, Colin AA. Treatment with tobramycin solution for inhalation reduces hospitalizations in young CF subjects with mild lung disease. *Pediatr Pulmonol*. 2004;38:314-20.
139. De Jong PA, Tiddens HA, Lequin MH, Robinson TE, Brody AS. Estimation of the radiation dose from CT in cystic fibrosis. *Chest*. 2008;133:1289-91.
140. Sawicki GS, Signorovitch JE, Zhang J, Latremouille-Viau D, von Wartburg M, Wu EQ, et al. Reduced mortality in cystic fibrosis patients treated with tobramycin inhalation solution. *Pediatr Pulmonol*. 2012;47:44-52.
141. Chuchalin A, Csiszér E, Gyurkovics K, Bartnicka MT, Sands D, Kapranov N, et al. A formulation of aerosolized tobramycin (Bramitob) in the treatment of patients with cystic fibrosis and *Pseudomonas aeruginosa* infection: a double-blind, placebo-controlled, multicenter study. *Paediatr Drugs*. 2007;9:21-31.
142. Konstan MW, Geller DE, Minić P, Brockhaus F, Zhang J, Angyalosi G. Tobramycin inhalation powder for *P. aeruginosa* infection in cystic fibrosis: The EVOLVE trial. *Pediatr Pulmonol*. 2011;46:230-8.
143. Konstan MW, Flume PA, Kappler M, Chiron R, Higgins M, Brockhaus F, et al. Safety, efficacy and convenience of tobramycin inhalation powder in cystic fibrosis patients: The EAGER trial. *J CystFibros*. 2011;10:54-61.
144. Oermann CM, Retsch-Bogart GZ, Quittner AL, Gibson RL, McCoy KS, Montgomery AB, et al. An 18-month study of the safety and efficacy of repeated courses of inhaled aztreonam lysine in cystic fibrosis. *Pediatr Pulmonol*. 2010;45:1121-34.
145. Assael BM, Pressler T, Bilton D, Fayon M, Fischer R, Chiron R, et al. Inhaled aztreonam lysine vs. inhaled tobramycin in cystic fibrosis: A comparative efficacy trial. *J Cyst Fibros*. 2012; 12:130-40.
146. Lo D, VanDevanter DR, Flume P, Smyth A. Aerosolized antibiotic therapy for chronic cystic fibrosis airway infections: continuous or intermittent?. *Respir Med*. 2011;105(Suppl 2):S9-17.

147. Herrmann G, Yang L, Wu H, Song Z, Wang H, Høiby N, et al. Colistin-tobramycin combinations are superior to monotherapy concerning the killing of biofilm *Pseudomonas aeruginosa*. *J Infect Dis*. 2010;202:1585-92.
148. Bilton D, Canny G, Conway S, Dumcius S, Hjelte L, Proesmans M, et al. Pulmonary exacerbation: towards a definition for use in clinical trials. Report from the EuroCareCF Working Group on outcome parameters in clinical trials. *J Cyst Fibros*. 2011;10(Suppl 2):S79-81.
149. Kraynack NC, Gothard MD, Falletta LM, McBride JT. Approach to treating cystic fibrosis pulmonary exacerbations varies widely across US CF care centers. *Pediatr Pulmonol*. 2011;46:870-81.
150. Sanders DB, Hoffman LR, Emerson J, Gibson RL, Rosenfeld M, Redding GJ, et al. Return of FEV1 after pulmonary exacerbation in children with cystic fibrosis. *Pediatr Pulmonol*. 2010;45:127-34.
151. Conway SP, Pond MN, Watson A, Etherington C, Robey HL, Goldman MH. Intravenous colistin sulphomethate in acute respiratory exacerbations in adult patients with cystic fibrosis. *Thorax*. 1997;52:987-93.
152. Smyth AR, Bhatt J. Once-daily versus multiple-daily dosing with intravenous aminoglycosides for cystic fibrosis. *Cochrane Database Syst Rev*. 2014 Feb 4;2:CD002009.
153. Plummer A, Wildman M. Duration of intravenous antibiotic therapy in people with cystic fibrosis. *Cochrane Database Syst Rev*. 2013 May 31;5:CD006682.
154. Collaco JM, Green DM, Cutting GR, Naughton KM, Mogayzel PJ Jr. Location and duration of treatment of cystic fibrosis respiratory exacerbations do not affect outcomes. *Am J Respir Crit Care Med*. 2010;182:1137-43.
155. Balaguer A, González de Dios J. Home versus hospital intravenous antibiotic therapy for cystic fibrosis. *Cochrane Database Syst Rev*. 2012 Mar 14; 3:CD001917.
156. Chmiel JF, Konstan MW. Inflammation and anti-inflammatory therapies for cystic fibrosis. *Clin Chest Med*. 2007;28:331.
157. Pressler T. Targeting airway inflammation in cystic fibrosis in children: past, present, and future. *Paediatr Drugs*. 2011;13:141-7.
158. Saiman L, Marshall BC, Mayer-Hamblett N, Burns JL, Quittner AL, Cibene DA, et al. Azithromycin in patients with cystic fibrosis chronically infected with *Pseudomonas aeruginosa*: a randomized controlled trial. *JAMA*. 2003; 290:1749-56.
159. Altenburg J, de Graaff CS, van der Werf TS, Boersma WG. Immunomodulatory effects of macrolide antibiotics - part 1: biological mechanisms. *Respiration*. 2011;81:67-74.
160. Southern KW, Barker PM, Solis-Moya A, Patel L. Macrolide antibiotics for cystic fibrosis. *Cochrane Database Syst Rev*. 2012 Nov 14; 11:CD002203.
161. Wilms EB, Touw DJ, Heijerman HG, van der Ent CK. Azithromycin maintenance therapy in patients with cystic fibrosis: a dose advice based on a review of pharmacokinetics, efficacy, and side effects. *Pediatr Pulmonol*. 2012;47:658-65.
162. Royal Brompton Hospital. Clinical Guidelines: Care of Children with Cystic Fibrosis. 5th edition 2011 (<http://www.rbht.nhs.uk/healthprofessionals/clinical-departments/paediatrics/childrencf/>)

163. Saiman L, Marshall BC, Mayer-Hamblett N, Burns JL, Quittner AL, Cibene DA, et al. Azithromycin in patients with cystic fibrosis chronically infected with *Pseudomonas aeruginosa*: a randomized controlled trial. *JAMA*. 2003;290:1749-56.
164. Konstan MW, Byard PJ, Hoppel CL, Davis PB. Effect of high-dose ibuprofen in patients with cystic fibrosis. *N Engl J Med*. 1995;323:848-54.
165. Lands LC, Milner R, Cantin AM, Manson D, Corey M. High-dose ibuprofen in cystic fibrosis: Canadian safety and effectiveness trial. *J Pediatr* 2007;151:249-54.
166. Konstan MW, Schluchter MD, Xue W, Davis PB. Clinical use of ibuprofen is associated with slower FEV1 decline in children with cystic fibrosis. *Am J Respir Crit Care Med*. 2007;176: 1084-9.
167. Konstan MW. Ibuprofen therapy for cystic fibrosis lung disease: revisited. *Curr Opin Pulmonary Medicine* 2008;14:567
168. Cheng K, Ashby D, Smyth RL. Oral steroids for long-term use in cystic fibrosis. *Cochrane Database Syst Rev*. 2011 Oct 5;10:CD000407.
169. Kieninger E, Regamey N. Targeting inflammation in cystic fibrosis. *Respiration* 2010;79:189-90
170. Balfour-Lynn IM, Welch K. Inhaled corticosteroids for cystic fibrosis. *Cochrane Database Syst Rev*. 2012 Nov 14; 11:CD001915
171. Rebeyrol C, Saint-Criq V, Guillot L, Riffault L, Corvol H, Chadelat K, et al. Glucocorticoids reduce inflammation in cystic fibrosis bronchial epithelial cells. *Cell Signal*. 2012;24:1093-9.
172. De Boeck K, Vermeulen F, Wanyama S, Thomas M; members of the Belgian CF Registry. Inhaled corticosteroids and lower lung function decline in young children with CF. *Eur Respir J*. 2011;37:1091-5
173. Ren CL, Pasta DJ, Rasouliyan L, Wagener JS, Konstan MW, Morgan WJ, et al. Relationship between inhaled corticosteroid therapy and rate of lung function decline in children with CF. *J Pediatr* 2008;153:746-51.
174. UK Cystic Fibrosis Trust. Infection Control Group *Pseudomonas aeruginosa* infection in people with cystic fibrosis. Suggestions for prevention and infection control. 2<sup>nd</sup> edition, 2004. <http://www.cftrust.org.uk/aboutcf/publications/consensusdoc/>
175. O'Malley CA. Infection control in cystic fibrosis: cohorting, cross-contamination, and the respiratory therapist. *Respir Care*. 2009;54:641-57.
176. Saiman L, Siegel JD, LiPuma JJ, Brown RF, Bryson EA, Chambers MJ, et al. Infection prevention and control guideline for cystic fibrosis: 2013 update. *Infect Control Hosp Epidemiol*. 2014; 35 (Suppl 1):S1-S67.
177. Zhou J, Garber E, Saiman L. Survey of infection control policies for patients with cystic fibrosis in the United States. *Am J Infect Control*. 2008;36:220-2.
178. Siegel JD, Rhinehart E, Jackson M, Chiarello L; Health Care Infection Control Practices Advisory Committee. 2007 Guideline for isolation precautions: preventing transmission of infectious agents in health care settings. *Am J Infect Control*. 2007; 35(10 Suppl 2):S65-164.
179. Zuckerman JB, Zuaro DE, Prato BS, Ruoff KL, Sawicki RW, Quinton HB, et al. Bacterial contamination of cystic fibrosis clinics. *J Cyst Fibros*. 2009;8:186- 92

180. Casey AL, Adams D, Karpanen TJ, Lambert PA, Cookson BD, Nightingale P, et al. Role of copper in reducing hospital environment contamination. *J Hosp Infect.* 2010;74:72-7.
181. Mikolay A, Huggett S, Tikana L, Grass G, Braun J, Nies DH. Survival of bacteria on metallic copper surfaces in a hospital trial. *Appl Microbiol Biotechnol.* 2010;87:1875-9.
182. Sangsiry SS, Joish VN, Boklage S, Goyal RK, Chopra P, Sethi S. Economic burden of *Pseudomonas aeruginosa* infection in patients with cystic fibrosis. *J Med Econom.* 2012;15:219-24.
183. Schreyögg J, Hollmeyer H, Bluemel M, Staab D, Busse R. Hospitalisation costs of cystic fibrosis. *Pharmacoeconomics.* 2006;24:999-1009.
184. Braccini G, Festini F, Boni V, Neri AS, Galici V, Campana S et al. The costs of treatment of early and chronic *Pseudomonas aeruginosa* infection in cystic fibrosis patients. *J Chemother.* 2009;21:188-92.
185. Heimeshoff M, Hollmeyer H, Schreyo J, Tiemann O, Staab D. Cost of Illness of cystic fibrosis in Germany. Results from a Large Cystic Fibrosis Centre. *Pharmacoeconomics.* 2012;30:763-77.
186. DeWitt EM, Grussemeyer CA, Friedman JY, Dinan MA, Lin L, Schulman KA, et al. Resource use, costs and utility estimates for patients with cystic fibrosis with mild impairment in lung function: Analysis of data collected alongside a 48-week multicenter clinical trial. *Value Health* 2012;15:277-83.
187. López Bastida J, Linertová R, Serrano Aguilar P, Hens Pérez M, Posada de la Paz M, Oliva Moreno J. Los costes socioeconómicos y la calidad de vida relacionada con la salud en pacientes con enfermedades raras en España. Proyecto del IMSERSO N° 167/10, Marzo 2012. Disponible en:[http://www.fqmadrid.org/Noticias/costes\\_socioeconomicos/Costes\\_socioeconomicos\\_ER\\_2012.pdf](http://www.fqmadrid.org/Noticias/costes_socioeconomicos/Costes_socioeconomicos_ER_2012.pdf)
188. Ramsey BW, Davies J, McElvaney NG, Tullis E, Bell SC, Dřevínek P, et al. A CFTR potentiator in patients with cystic fibrosis and the G551D mutation. *N Engl J Med.* 2011;365:1663-72.

**Tabla 1. Grados de evidencia clínica**

| Calidad de la evidencia |                                                                                                                                                         | Fuerza de la recomendación <sup>1</sup> |                                             |
|-------------------------|---------------------------------------------------------------------------------------------------------------------------------------------------------|-----------------------------------------|---------------------------------------------|
| Grado                   | Definición                                                                                                                                              | Categoría                               | Definición                                  |
| <b>I</b>                | Evidencia de al menos un ensayo clínico controlado y aleatorizado                                                                                       | <b>A</b>                                | Evidencia buena para recomendar su uso      |
| <b>II</b>               | Evidencia de al menos un ensayo clínico controlado y no aleatorizado o estudios de cohortes o de casos y controles, preferiblemente de más de un centro | <b>B</b>                                | Evidencia moderada para recomendar su uso   |
| <b>III</b>              | Recomendación de expertos, basada en experiencia clínica o descripción de casos                                                                         | <b>C</b>                                | Evidencia pobre para recomendar su uso      |
|                         |                                                                                                                                                         | <b>D</b>                                | Evidencia moderada para desaconsejar su uso |

1: se pondera según la experiencia clínica

**Tabla 2. Criterios para definir las exacerbaciones en los pacientes con fibrosis quística**<sup>38,40,41</sup>

| Síntomas y Signos                                                                                                                                                                                                                                                                                                                                                                                                                                                                                                                                                                                                                     | Criterios radiológicos, funcionales y/o analíticos                                                                                                                                                                                                                                                                                                                                                                                                                                                                                                                                                                                                              |
|---------------------------------------------------------------------------------------------------------------------------------------------------------------------------------------------------------------------------------------------------------------------------------------------------------------------------------------------------------------------------------------------------------------------------------------------------------------------------------------------------------------------------------------------------------------------------------------------------------------------------------------|-----------------------------------------------------------------------------------------------------------------------------------------------------------------------------------------------------------------------------------------------------------------------------------------------------------------------------------------------------------------------------------------------------------------------------------------------------------------------------------------------------------------------------------------------------------------------------------------------------------------------------------------------------------------|
| <ul style="list-style-type: none"> <li>• Cambios en la intensidad y/o características de la tos</li> <li>• Cambio en las características del esputo (aumento del volumen, purulencia y/o consistencia)</li> <li>• Aumento o aparición de disnea y/o disminución de tolerancia al ejercicio</li> <li>• Anorexia, astenia y/o pérdida de peso</li> <li>• Dolor torácico</li> <li>• Fiebre <math>\geq 38^{\circ}\text{C}</math> en más de una ocasión en la semana previa</li> <li>• Aumento de la frecuencia respiratoria</li> <li>• Modificaciones en la auscultación pulmonar</li> <li>• Hemoptisis u otras complicaciones</li> </ul> | <ul style="list-style-type: none"> <li>• Disminución del <math>\text{FEV}_1 \geq 10\%</math>, respecto a valores basales de los últimos 3 meses</li> <li>• Disminución de la saturación de <math>\text{O}_2 \geq 10\%</math>, respecto a valores basales de los últimos 3 meses</li> <li>• Aumento de marcadores de inflamación (VSG, proteína C reactiva...)</li> <li>• Aumento del atrapamiento aéreo o aparición de nuevos infiltrados radiológicos</li> <li>• Cambios en la densidad bacteriana de la flora colonizadora o adquisición de un nuevo microorganismo</li> <li>• Modificación o aumento de anticuerpos frente a <i>P. aeruginosa</i></li> </ul> |



**Tabla 3. Patrones y criterios microbiológicos en la colonización-infección pulmonar por *Pseudomonas aeruginosa* en el paciente con fibrosis quística**<sup>1,22,67</sup>

| Estadios                                                            | Definición                                                                                                                                                                                                                | Criterio microbiológico                                                      | Comentarios                                                                                                                                                                                                                                                                                                                             |
|---------------------------------------------------------------------|---------------------------------------------------------------------------------------------------------------------------------------------------------------------------------------------------------------------------|------------------------------------------------------------------------------|-----------------------------------------------------------------------------------------------------------------------------------------------------------------------------------------------------------------------------------------------------------------------------------------------------------------------------------------|
| <b>I: Infección inicial</b><br>(primoinfección o infección pionera) | Detección del primer cultivo positivo de <i>P. aeruginosa</i> en el árbol bronquial. No suelen aparecer manifestaciones clínicas aunque puede existir respuesta inflamatoria                                              | Primer cultivo positivo de <i>P. aeruginosa</i>                              | Un cultivo positivo después de un año de negatividad, tras finalizar el tratamiento, se considera como una nueva primoinfección<br>Suelen ser cepas con colonias no mucosas, con escasa diversidad de morfotipos y sensibles a los antimicrobianos<br>No suele aparecer respuesta inmunológica específica frente a <i>P. aeruginosa</i> |
| <b>II: Infección intermitente</b>                                   | Presencia de cultivos intermitentes positivos y negativos para <i>P. aeruginosa</i> en muestras consecutivas tras la infección inicial. Pueden no existir manifestaciones clínicas y suele existir respuesta inflamatoria | ≤50% de cultivos positivos para <i>P. aeruginosa</i> en los 12 meses previos | Pueden aparecer cepas con colonias mucosas y otros morfotipos coloniales<br>Puede aparecer respuesta inmunológica específica frente a <i>P. aeruginosa</i>                                                                                                                                                                              |
| <b>III: Infección Crónica</b>                                       | Cultivos positivos persistentes de <i>P. aeruginosa</i> sin signos clínicos nuevos de infección y con respuesta inflamatoria                                                                                              | >50% de cultivos positivos para <i>P. aeruginosa</i> en los 12 meses previos | Suele producirse por cepas con colonias mucosas y otros morfotipos coloniales<br>Es el patrón habitual en periodos avanzados de la enfermedad<br>Existe respuesta inmunológica consistente con la presencia de <i>P. aeruginosa</i>                                                                                                     |
| <b>IV: Exacerbación</b>                                             | Aparición o aumento de síntomas respiratorios durante el curso de la infección crónica                                                                                                                                    | Cultivo positivo para <i>P. aeruginosas</i>                                  | Aumento del recuento bacteriano<br>En pacientes sin estudio microbiológico puede utilizarse como criterio diagnóstico el aumento de anticuerpos en dos muestras de sangre sucesivas                                                                                                                                                     |

**Tabla 4. Antimicrobianos comercializados (por orden alfabético) para uso inhalado en fibrosis quística**

| Antimicrobiano y formulación                      | Nombre comercial            | Comercializado en España (a fecha del documento) | Dosis, frecuencia de administración recomendada en ficha técnica   | Tiempo de administración                                         | Sistema de inhalación |
|---------------------------------------------------|-----------------------------|--------------------------------------------------|--------------------------------------------------------------------|------------------------------------------------------------------|-----------------------|
| Aztreonam lisina, solución para inhalación (AZLI) | Cayston®                    | SI                                               | 75 mg, 3 veces al día                                              | 2-3 min                                                          | Altera                |
| Colistina, solución para inhalación (COL)*        | Colistimetato de sodio GES® | SI                                               | 0,5-2 millones UI<br>(1 millón = 80 mg of COL), 2 o 3 veces al día | Variable                                                         | Variable***           |
|                                                   | Colomycin®                  | NO                                               |                                                                    |                                                                  |                       |
|                                                   |                             | Promixin®                                        | SI                                                                 | 0,5-1 millón UI<br>(1 millón = 80 mg of COL), 2 o 3 veces al día | 3,7 ± 2,3 min         |
| Colistina, polvo seco para inhalación (COL-P)     | Colobreathe®                | NO                                               | 1,662,500 IU<br>(125 mg of COL), 2 veces al día                    | No especificado                                                  | Turbospin             |
| Tobramicina, solución para inhalación (TNS)*      | TOBI®                       | SI                                               | 300 mg/5 mL, 2 veces al día                                        | ~ 20 min                                                         | Pari-LC Plus***       |
|                                                   | Tobramicina Teva®           | SI                                               |                                                                    |                                                                  |                       |
|                                                   | Tobramicina Combino Pharm®  | SI                                               |                                                                    |                                                                  |                       |
|                                                   | Actitob®                    | NO                                               | 300 mg/4 mL, 2 veces al día                                        | ~ 15 min                                                         |                       |
|                                                   | Bramitob®                   | SI                                               |                                                                    |                                                                  |                       |
|                                                   | Tobrineb®                   | SI                                               |                                                                    |                                                                  |                       |
| Tobramicina, polvo para inhalación (TIP)          | TOBI Podhaler® (T-326)      | SI**                                             | 112 mg, 2 veces al día                                             | ~ 6 min                                                          | Podhaler (T-326)      |

\*genéricos en algunos países; \*\*sin reembolso

\*\*\*en ocasiones se utilizan nebulizadores malla

**Tabla 5.** Dosis recomendadas y vía de administración de los antibióticos utilizados en las exacerbaciones por *Pseudomonas aeruginosa* en fibrosis quística

| Grupo o familia de Antimicrobiano | Antimicrobiano | Vía de administración | Pauta de administración en: |                           |
|-----------------------------------|----------------|-----------------------|-----------------------------|---------------------------|
|                                   |                |                       | Niños (<50 Kg)              | Adultos (>50 Kg)          |
| Penicilinas                       | Piperacilina   | IV                    | 100 mg/Kg/6 h               | 2-4 <sup>a</sup> g/6-8 h  |
|                                   | /tazobactam    |                       |                             |                           |
| Cefalosporinas                    | Ceftazidima    | IV                    | 50-70 mg/Kg/8 h             | 2 g/8 h                   |
|                                   | Cefepima       | IV                    | 50 mg/Kg/8 h                | 2 g/8 h                   |
| Otros $\beta$ -lactámicos         | Aztreonam      | IV o IM               | 50 mg/ Kg/8 h               | 1-2 g/6-8 h               |
|                                   | Imipenem       | IV o IM               | 15-25 mg/Kg/6 h             | 1 g/6-8 h                 |
|                                   | Meropenem      | IV                    | 20-40 mg/Kg/8 h             | 2 g/8 h                   |
|                                   | Doripenem      | IV                    | No recomendado              | 0,5-1 g/8 h <sup>b</sup>  |
| Aminoglucósidos                   | Gentamicina    | IV o IM               | 10-15 mg/Kg/24 h            | 10-15 mg/Kg/24 h          |
|                                   | Tobramicina    | IV o IM               | 5-10 mg/Kg/24 h             | 5-10 mg/Kg/24 h           |
|                                   | Amikacina      | IV o IM               | 30-35 mg/kg/24 h            | 30-35 mg/Kg/24 h          |
| Quinolonas                        | Ciprofloxacino | Oral                  | 15-20 mg/Kg/12 h            | 0,75 g/12 h               |
|                                   |                | IV                    | 15-20 mg/Kg/12 h            | 0,4 g/12 h                |
|                                   | Levofloxacino  | oral o IV             | ND                          | 0,5 g/12 h<br>0,75 g/24 h |
| Otros                             | Colistina      | IV o IM               | 20.000 UI/Kg/8 h            | 2.000.000 UI/8 h          |

a: expresado como piperacilina; <sup>b</sup> perfusión en 4 h; IV: intravenoso; IM: intramuscular; ND: no definida

**Tabla 6.** Tratamiento antimicrobiano en la infección bronquial por *Pseudomonas aeruginosa* en el paciente con fibrosis quística según su situación clínica.  
(los antimicrobianos inhalados se recogen por orden cronológico de utilización en España y no suponen un orden de prioridad en las recomendaciones)

| Situación clínica                                                        | Tratamiento                                                                                                                                                                                                                      | Comentarios                                                                                                                                                                                                                                                                                                                                                                                                                                                                                                                                                                                                                                                                                                                                                                                                                                                                                                                                                                                                                                                                                                                                         |
|--------------------------------------------------------------------------|----------------------------------------------------------------------------------------------------------------------------------------------------------------------------------------------------------------------------------|-----------------------------------------------------------------------------------------------------------------------------------------------------------------------------------------------------------------------------------------------------------------------------------------------------------------------------------------------------------------------------------------------------------------------------------------------------------------------------------------------------------------------------------------------------------------------------------------------------------------------------------------------------------------------------------------------------------------------------------------------------------------------------------------------------------------------------------------------------------------------------------------------------------------------------------------------------------------------------------------------------------------------------------------------------------------------------------------------------------------------------------------------------|
| <b>Primer cultivo positivo por <i>P. aeruginosa</i> (primoinfección)</b> |                                                                                                                                                                                                                                  |                                                                                                                                                                                                                                                                                                                                                                                                                                                                                                                                                                                                                                                                                                                                                                                                                                                                                                                                                                                                                                                                                                                                                     |
| • Sin clínica                                                            | Colistina inhalada 1 mes, 0,5-2 millones U, 2-3 veces día (I-A) ± Ciprofloxacino oral<br>o<br>Tobramicina inhalada 28 días, 300 mg, 2 veces día (I-A)<br>o<br>Aztreonam inhalado 28 días, 75 mg, 3 veces día (II-A) <sup>1</sup> | Realizar cultivo 1-2 semanas después de finalizar el tratamiento:<br>- <b>si es negativo:</b> prolongar la misma pauta de tratamiento continuo con colistina (máximo 3-6 meses) o con 1-3 ciclos <i>on-off</i> con tobramicina o aztreonam (máximo 6 meses) (II-A)<br>- <b>si es positivo:</b> repetir la misma pauta de tratamiento o cambiar por otra combinación (ciprofloxacino + un antibiótico inhalado no utilizado en el primer ciclo) (III-A). Realizar un nuevo cultivo 1-2 semanas después de finalizar el tratamiento y si continúa siendo positivo, aplicar el protocolo de la infección crónica (I-A)<br>Los protocolos de erradicación ensayados son muy variados con pautas que incluyen antibióticos inhalados y orales. Si fracasan al menos dos estrategias con esta pauta, se han propuesto antibióticos inhalados más IV simultáneamente (I-B)<br>Diferenciar siempre entre la primoinfección en niños diagnosticados por cribado con poca lesión pulmonar y adultos o reciente reinfección por <i>P. aeruginosa</i><br>En niños con primoinfección es posible que sea suficiente un tratamiento de menor duración (1-3 meses) |
| • Con clínica                                                            | seguir la recomendación de la infección crónica con exacerbación                                                                                                                                                                 |                                                                                                                                                                                                                                                                                                                                                                                                                                                                                                                                                                                                                                                                                                                                                                                                                                                                                                                                                                                                                                                                                                                                                     |

**Infección crónica por *P. aeruginosa***

|                             |                                                                                                     |                                                                                |                                                                                                                                                                                                                                                                                                                                                                                                                                                                                                                |   |
|-----------------------------|-----------------------------------------------------------------------------------------------------|--------------------------------------------------------------------------------|----------------------------------------------------------------------------------------------------------------------------------------------------------------------------------------------------------------------------------------------------------------------------------------------------------------------------------------------------------------------------------------------------------------------------------------------------------------------------------------------------------------|---|
| • Clínica estable           | Colistina inhalada tratamiento continuo, 0,5-2 millones U, 2-3 veces día (III-A) <sup>2,3</sup>     |                                                                                | Mantener pauta inhalada mientras el beneficio/riesgo sea favorable<br>En afectación pulmonar moderada-grave o respuesta insuficiente en los ciclos <i>on-off</i> ,<br>- emplear los antibióticos inhalados de manera continua, alternando/rotando sin periodos de descanso entre ellos o con intervalos <i>off</i> más cortos de 28 días (III-B)<br>- asociar un antibiótico oral o IV <sup>6</sup> con actividad antipseudomonas según sensibilidad, a demanda o en ciclos (cada 3-6 meses) (III-B)           |   |
|                             | o                                                                                                   |                                                                                |                                                                                                                                                                                                                                                                                                                                                                                                                                                                                                                |   |
|                             | Tobramicina inhalada en ciclos <i>on-off</i> cada 28 días, 300 mg, 2 veces al día (I-A)             |                                                                                |                                                                                                                                                                                                                                                                                                                                                                                                                                                                                                                |   |
|                             | Tobramicina inhalada polvo seco en ciclos <i>on-off</i> , 112 mg, 2 veces al día (I-A) <sup>4</sup> |                                                                                |                                                                                                                                                                                                                                                                                                                                                                                                                                                                                                                |   |
|                             | o                                                                                                   |                                                                                |                                                                                                                                                                                                                                                                                                                                                                                                                                                                                                                |   |
|                             | Aztreonam inhalado en ciclos <i>on-off</i> cada 28 días, 75 mg, 3 veces al día (I-A) <sup>5</sup>   |                                                                                |                                                                                                                                                                                                                                                                                                                                                                                                                                                                                                                |   |
| • Exacerbación <sup>7</sup> | Exacerbación leve:                                                                                  | tratamiento con un antibiótico oral con actividad antipseudomonas, 2-3 semanas | Valorar mantener pauta inhalada si está pautada con anterioridad (III-C)<br>Prolongar tratamiento IV si no hay mejoría o existe afectación grave (3-4 semanas) (III-A)<br>En ausencia de respuesta al tratamiento o en multirresistencia, adecuar el tratamiento combinado IV al perfil de sensibilidad con penicilinas antipseudomonas (piperacilina/tazobactam), monobactámicos (aztreonam) o un carbapenem (imipenem, meropenem o doripenem) en combinación con un aminoglucósido o con una fluoroquinolona |   |
|                             | Exacerbación grave:                                                                                 | Ceftazidima IV + Tobramicina IV                                                |                                                                                                                                                                                                                                                                                                                                                                                                                                                                                                                |   |
|                             |                                                                                                     | 50-70 mg/Kg/8h 5-10 mg/Kg/24h                                                  |                                                                                                                                                                                                                                                                                                                                                                                                                                                                                                                |   |
|                             |                                                                                                     | o                                                                              |                                                                                                                                                                                                                                                                                                                                                                                                                                                                                                                | o |
|                             |                                                                                                     | Cefepima IV Amikacina IV                                                       |                                                                                                                                                                                                                                                                                                                                                                                                                                                                                                                |   |
|                             | 50 mg/Kg/8h 30-35 mg/Kg/24h                                                                         |                                                                                |                                                                                                                                                                                                                                                                                                                                                                                                                                                                                                                |   |
|                             | 2-3 semanas 2-3 semanas                                                                             |                                                                                |                                                                                                                                                                                                                                                                                                                                                                                                                                                                                                                |   |

1: en pacientes mayores de 3 meses y menores de 18 años

2: el nivel de evidencia se ha establecido en función de los estudios publicados y no con la amplia experiencia de su utilización. Por ello a pesar de que el nivel de evidencia es diferente a los nuevos fármacos, su nivel de recomendación es alto

3: 3 veces al día en caso de evolución agresiva de la enfermedad

4: comercializado en España sin reembolso

5: en pacientes con 6 o más años de edad

6: tratamiento como en la exacerbación;

7: utilizar esta pauta en primoinfección con clínica de exacerbación

IV: intravenoso

**Tabla 7.** Medidas de control epidemiológico en diferentes ámbitos en el paciente con fibrosis quística e infección bronquial por *Pseudomonas aeruginosa*

| Medida                                                                                                                                                                                                               | Extrahospitalario /Domicilio | Consulta externa   | Hospitalización    |
|----------------------------------------------------------------------------------------------------------------------------------------------------------------------------------------------------------------------|------------------------------|--------------------|--------------------|
| Seguir las medidas generales de control de infección de cada centro y disponer de un manual de control de infección adaptado al centro y a los pacientes con FQ                                                      | -                            | III-A              | III-A              |
| Mantener una adecuada higiene (lavado de manos) de pacientes, familiares y personal                                                                                                                                  | III-A                        | III-A              | III-A              |
| Mantener distancia mínima entre pacientes de 1-2 metros                                                                                                                                                              | III-A                        | III-A              | III-A              |
| No compartir con otros pacientes aparatos para pruebas funcionales y atención sanitaria (espirómetros, fonendoscopios, pulsioxímetros...)                                                                            | -                            | III-B              | III-B              |
| Limpieza de superficies y aparatos después de la atención de cada paciente                                                                                                                                           | -                            | III-A              | III-A              |
| Implantar medidas de barrera (mascarillas, batas desechables, ...) en pacientes con infección por microorganismos multirresistentes o hipertransmisibles, exacerbación o síntomas respiratorios (tos, estornudos...) | (III-A) <sup>1</sup>         | III-A              | III-A              |
| Segregación de pacientes según el microorganismo infectante (por ejemplo <i>P. aeruginosa</i> , <i>S. aureus</i> , ...) y tipo de infección (intermitente, crónica)                                                  | -                            | III-A <sup>1</sup> | III-A <sup>1</sup> |
| Segregación de pacientes infectados por aislados de <i>P. aeruginosa</i> multirresistentes o hipertransmisibles                                                                                                      | III-A                        | III-A              | III-A              |
| Atención de pacientes por personal sanitario específico en función del tipo de infección, presencia de patógenos multirresistentes o hipertransmisibles                                                              | -                            | III-C              | III-C              |
| Establecer protocolos en la atención por el fisioterapeuta que incluya lavado de manos, uso de guantes, batas desechables, ...                                                                                       | III-B <sup>2</sup>           | III-B              | III-B              |
| Disponibilidad de juguetes, libros, etc. propios de cada paciente                                                                                                                                                    | III-C <sup>3</sup>           | III-C              | III-C              |
| Utilización de superficies de cobre                                                                                                                                                                                  | -                            | III-C <sup>1</sup> | III-C <sup>1</sup> |
| Informar del estadio de infección al paciente y de las medidas de prevención de infección                                                                                                                            | III-C                        | III-C              | III-C              |
| Informar a responsables escolares y segregación en las aulas a los pacientes con infección por microorganismos multirresistentes o hipertransmisibles                                                                | III-C                        | -                  | -                  |
| No asistir a campamentos, reuniones, vacaciones conjuntas con otros pacientes con fibrosis quística                                                                                                                  | III-B                        | -                  | -                  |
| Utilizar habitaciones diferentes en hermanos con FQ con zonas separadas para el tratamiento nebulizado y fisioterapia                                                                                                | III-C                        | -                  | -                  |
| Limpieza y desinfección de equipos de aerosolización según instrucciones del fabricante                                                                                                                              | III-A                        | III-A              | III-A              |
| No utilizar saunas, jacuzzis, balnearios                                                                                                                                                                             | III-B                        | -                  | -                  |

1: valorar en cada centro el coste efectividad de esta recomendación;

2: en atención domiciliaria;

3: en hermanos con FQ

**Tabla 8.** Aspectos clave en las intervenciones de coste efectividad en el tratamiento de la infección bronquial por *Pseudomonas aeruginosa* en fibrosis quística

| <b>Intervención</b>                                                                                                                                                                                        | <b>Beneficios</b>                                                                                                                                                                                                         |
|------------------------------------------------------------------------------------------------------------------------------------------------------------------------------------------------------------|---------------------------------------------------------------------------------------------------------------------------------------------------------------------------------------------------------------------------|
| <ul style="list-style-type: none"> <li>• Tratamientos agresivos durante la primocolonización</li> </ul>                                                                                                    | <ul style="list-style-type: none"> <li>• Evitar la cronicidad y limitar la alta prevalencia de la infección crónica por <i>P. aeruginosa</i></li> <li>• Disminuir los costes asociados de la infección crónica</li> </ul> |
| <ul style="list-style-type: none"> <li>• Tratamiento supresor de la infección crónica</li> </ul>                                                                                                           | <ul style="list-style-type: none"> <li>• Reducción del deterioro pulmonar progresivo y mejora de la calidad de vida</li> </ul>                                                                                            |
| <ul style="list-style-type: none"> <li>• Tratamiento eficaz de las exacerbaciones</li> </ul>                                                                                                               | <ul style="list-style-type: none"> <li>• Reducción del deterioro pulmonar progresivo</li> </ul>                                                                                                                           |
| <ul style="list-style-type: none"> <li>• Reducir las hospitalizaciones en favor de otras estrategias como la atención domiciliaria</li> </ul>                                                              | <ul style="list-style-type: none"> <li>• Mayor calidad de vida y disminución de riesgos asociados a los ingresos hospitalarios</li> </ul>                                                                                 |
| <ul style="list-style-type: none"> <li>• Modificar la forma de administración de los antibióticos (perfusión extendida o continua, aumento de la dosis, disminución de tiempo entre dosis, ...)</li> </ul> | <ul style="list-style-type: none"> <li>• Favorecer la adecuación de los tratamientos a criterios PK/PD de eficacia terapéutica</li> </ul>                                                                                 |
| <ul style="list-style-type: none"> <li>• Asegurar el cumplimiento del tratamiento en los pacientes con infección por <i>P. aeruginosa</i></li> </ul>                                                       | <ul style="list-style-type: none"> <li>• Reducción del deterioro pulmonar progresivo</li> </ul>                                                                                                                           |
| <ul style="list-style-type: none"> <li>• Medida de la calidad de vida</li> </ul>                                                                                                                           | <ul style="list-style-type: none"> <li>• Evaluación de las intervenciones realizadas</li> </ul>                                                                                                                           |
